# Supplementary material for: Perfect symmetrical cyclic aromatic trimer motif in tripodal molecule
Source: Royal Society of Chemistry journal article supplement (doi:10.1039/c7ra01682d), 2017-01-01
Supplement: c7ra01682d1.pdf [file c7ra01682d1.pdf]

## Supporting Information

### Perfect symmetrical cyclic aromatic trimer motif in tripodal molecule

Shankar Deval Sathiyashivan, Chakka Kiran Kumar, Bhaskaran Shankar, Malaichamy Sathiyendiran and Dhanraj T. Masram

*Department of Chemistry, University of Delhi 110 007, India*  
*School of Chemistry, University of Hyderabad, Hyderabad 500 046, India*

#### Contents

**Table S1** Geometrical parameters of molecules **I-IV** and **6**.

**Fig. S1** Molecular structure of **3**.

**Fig. S2** Partial packing diagram showing four molecules of **3** (A). One full molecule with partial three molecules of **3** (B). **I**, **II**, and **III** are the portion of two neighboring methoxyphenylbenzimidazolyl units. Hydrogen atom is included only for carbon involving the C-H... $\pi$  interactions.

**Fig. S3** Partial packing diagram showing three adjacent molecules of **3** (A). Spacer benzene and CBT core (B). Two aromatic units indicate the intermolecular *edge-to-face* C-H... $\pi$  interactions. Hydrogen atom is included only for carbon involving the C-H... $\pi$  interactions.

**Fig. S4** Partial packing diagram showing four molecules of **6** (A). Two neighboring phenylbenzimidazolyl units and CH<sub>2</sub> unit in ethyl group involve in noncovalent interactions (B). Hydrogen atom is included only for carbon involving the C-H... $\pi$  interactions.

**Fig. S5** Partial packing diagram showing three adjacent molecules of **6** (A). Spacer benzene and CBT core (B). CBT trimer unit, three benzene units, contacts with benzene spacer by intermolecular *edge-to-face* C-H... $\pi$  interactions. Hydrogen atom is included only for carbon involving the C-H... $\pi$  interactions.

**Fig. S6** Partial <sup>1</sup>H NMR spectra of L<sup>1</sup>, **1**, **2** and **3** in d<sub>6</sub>-DMSO.

**Fig. S7** Partial <sup>1</sup>H NMR spectra of L<sup>2</sup>, **4**, **5** and **6** in d<sub>6</sub>-DMSO.

**Fig. S8** Partial <sup>1</sup>H NMR spectra of L<sup>3</sup>, **7**, **8** and **9** in d<sub>6</sub>-DMSO.

**Fig. S9** Partial <sup>1</sup>H NMR spectra of **2**, **5** and **8** in d<sub>6</sub>-DMSO.

**Fig. S10** Partial <sup>1</sup>H NMR spectra of **3**, **6** and **9** in d<sub>6</sub>-DMSO.

**Fig. S11** Partial  $^1\text{H}$  NMR spectra of **1**, **4** and **7** in  $d_6$ -DMSO.

**Fig. S12**  $^1\text{H}$  NMR spectrum of **1** in  $d_6$ -DMSO (\* = residual solvent peaks).

**Fig. S13**  $^{13}\text{C}$  NMR spectrum of **1** in  $\text{CDCl}_3$ .

**Fig. S14**  $^1\text{H}$  NMR spectrum of **2** in  $d_6$ -DMSO (\* = residual solvent peak).

**Fig. S15**  $^{13}\text{C}$  NMR spectrum of **2** in  $d_6$ -DMSO(\* = residual solvent peaks).

**Fig. S16**  $^1\text{H}$  NMR spectrum of **3** in  $d_6$ -DMSO (\* = residual solvent peak).

**Fig. S17**  $^{13}\text{C}$  NMR spectrum of **3** in  $\text{CDCl}_3/d_6$ -DMSO.

**Fig. S18**  $^1\text{H}$  NMR spectrum of **4** in  $d_6$ -DMSO (\*residual solvent peaks).

**Fig. S19**  $^{13}\text{C}$  NMR spectrum of **4** in  $d_6$ -DMSO.

**Fig. S20**  $^1\text{H}$  NMR spectrum of **5** in  $d_6$ -DMSO (\* = residual solvent peak).

**Fig. S21**  $^{13}\text{C}$  NMR spectrum of **5** in  $d_6$ -DMSO.

**Fig. S22**  $^1\text{H}$  NMR spectrum of **6** in  $d_6$ -DMSO (\* = residual solvent peaks).

**Fig. S23**  $^{13}\text{C}$  NMR spectrum of **6** in  $\text{CDCl}_3$ .

**Fig. S24**  $^1\text{H}$  NMR spectrum of **7** in  $d_6$ -DMSO.

**Fig. S25**  $^{13}\text{C}$  NMR spectrum of **7** in  $d_6$ -DMSO(\* = residual solvent peaks).

**Fig. S26**  $^1\text{H}$  NMR spectrum of **8** in  $d_6$ -DMSO.

**Fig. S27**  $^{13}\text{C}$  NMR spectrum of **8** in  $d_6$ -DMSO.

**Fig. S28**  $^1\text{H}$  NMR spectrum of **9** in  $d_6$ -DMSO.

**Fig. S29**  $^{13}\text{C}$  NMR spectrum of **9** in  $\text{CDCl}_3$ .

### General experimental methods

*o*-phenylenediamine, *p*-anisaldehyde, 3,4-dimethoxybenzaldehyde, 3,4,5-trimethoxybenzaldehyde, NaHSO<sub>3</sub>, sodium hydride (NaH), 1,3,5-tris(bromomethyl)benzene, 1,3,5-tris(bromomethyl)-2,4,6-trimethylbenzene, 1,3,5-tris(bromomethyl)-2,4,6-triethylbenzene, tetrahydrofuran (THF) and dimethylformamide (DMF) were purchased from commercial sources and used as received. 2-(4-methoxyphenyl)benzimidazole (L<sup>1</sup>), 2-(3,4-dimethoxyphenyl)benzimidazole (L<sup>2</sup>) and 2-(3,4,5-trimethoxyphenyl)benzimidazole (L<sup>3</sup>) were prepared according to previously reported methods.<sup>3</sup> All reactions were carried out in inert atmosphere. NMR spectra were recorded on Bruker Avance III 400 and 500 MHz instruments. The chemical shifts ( $\delta$ ) were reported in parts per million (ppm) relative to residual solvent signal. HR-MS were recorded on a Bruker maXis mass spectrometer. Elemental analysis was performed on a Flash EA series 1112 CHNS analyzer.

### General procedure for the synthesis of tripodal molecules

To a solution of 2-substituted benzimidazole derivative (L<sup>1</sup>-L<sup>3</sup>, 1.0 equiv.) in dry THF at 0°C, NaH (1.2 equiv.) was added and allowed stir at room temperature for 1 h. To this solution, solid tribromo compound was added and allowed to stir for 72 h at 40-45 °C. The progress of the reaction was monitored by TLC. After completion of reaction, the solvent was removed under reduced pressure and ice water was added to the resulting mixture. The precipitated solid was collected by filtration under vacuum, washed with hexane and air dried.

**1,3,5-Tris(2-(4-methoxyphenyl)benzimidazol-1-ylmethyl)benzene (1):** According to general procedure, 176 mg of product was prepared from L<sup>1</sup> (188.5 mg, 0.8405 mmol), NaH (24.0 mg, 1.0 mmol), 1,3,5-tris(bromomethyl) benzene (100 mg, 0.2802 mmol) and obtained as white solid. Yield: 80%. <sup>1</sup>H-NMR (500 MHz, *d*<sub>6</sub>-DMSO, ppm):  $\delta$  7.69 (d, 3H,  $J_{\text{HH}} = 7.9$  Hz, H<sup>4</sup>), 7.28-7.23 (m, 9H, H<sup>5</sup> & H<sup>a,d</sup>), 7.20-7.13 (m, 6H, H<sup>b,c</sup>), 6.58 (m, 6H, H<sup>6,7</sup>), 6.58 (s, 3H, arene), 5.31 (s, 6H, -CH<sub>2</sub>-) and 3.77 (s, 9H, -OCH<sub>3</sub>). <sup>13</sup>C NMR (100 MHz, CDCl<sub>3</sub>, ppm):  $\delta$  160.91, 153.92, 143.10, 138.78, 135.71, 130.52, 123.63, 122.96, 122.78, 121.95, 120.00, 114.43, 114.23, 109.92 (aromatic), 55.40 (-OCH<sub>3</sub>) and 47.99 (-CH<sub>2</sub>-). HR-MS (*m/z*): Calc. for C<sub>51</sub>H<sub>43</sub>N<sub>6</sub>O<sub>3</sub> (M+H)<sup>+</sup>: 787.3397; found, 787.3401. Anal. Calc. for C<sub>51</sub>H<sub>42</sub>N<sub>6</sub>O<sub>3</sub>: C, 77.84; H, 5.38; N, 10.68 Found: C, 77.93; H, 5.32; N, 10.59.

**1,3,5-Tris(2-(4-methoxyphenyl)benzimidazol-1-ylmethyl)-2,4,6-trimethylbenzene (2):** According to general procedure, 136 mg of product was prepared from L<sup>1</sup> (168.6 mg, 0.7511 mmol), NaH (22.0 mg, 0.9013 mmol), 1,3,5-tris(bromomethyl)-2,4,6-trimethylbenzene (100 mg, 0.2506 mmol) and obtained as white solid. Yield: 66%. <sup>1</sup>H-NMR (500 MHz, *d*<sub>6</sub>-DMSO, ppm):  $\delta$  7.71 (d, 6H,  $J_{\text{HH}} = 8.7$  Hz, H<sup>a,d</sup>), 7.57 (d, 3H,  $J_{\text{HH}} = 7.9$  Hz, H<sup>4</sup>), 7.11-7.06 (m, 9H, H<sup>5</sup> & H<sup>b,c</sup>), 6.63 (t, 3H,  $J_{\text{HH}} = 7.7$  Hz, H<sup>6</sup>), 6.31 (d, 3H,  $J_{\text{HH}} = 8.2$  Hz, H<sup>7</sup>), 5.47 (s, 6H, -CH<sub>2</sub>-), 3.83 (s, 9H, -OCH<sub>3</sub>), and 1.84 (s, 9H, -CH<sub>3</sub>). <sup>13</sup>C NMR (100 MHz, *d*<sub>6</sub>-DMSO, ppm):  $\delta$  160.74, 154.48, 154.34, 143.16, 138.28, 137.47, 134.97, 131.65, 130.81, 128.50, 123.17, 122.52, 121.75, 119.44, 114.79, 114.47, 111.50 (aromatic), 55.76 (-OCH<sub>3</sub>), 46.17 (-CH<sub>2</sub>-) and 16.67 (-CH<sub>3</sub>). HR-MS (*m/z*): Calc. for C<sub>54</sub>H<sub>49</sub>N<sub>6</sub>O<sub>3</sub> (M+H)<sup>+</sup>: 829.3866; found, 829.3867. Anal. Calc. for C<sub>54</sub>H<sub>48</sub>N<sub>6</sub>O<sub>3</sub>: C, 78.24; H, 5.84; N, 10.14. Found: C, 78.32; H, 5.78, N, 10.07.

**1,3,5-Tris(2-(4-methoxyphenyl)benzimidazol-1-ylmethyl)-2,4,6-triethylbenzene (3):** According to general procedure, 148 mg of product was prepared from L<sup>1</sup> (152.5 mg, 0.68 mmol), NaH (20.0 mg, 0.82 mmol), 1,3,5-tris(bromomethyl)-2,4,6-triethylbenzene (100 mg, 0.2267 mmol) and obtained as white solid. Yield: 75%. <sup>1</sup>H NMR (400 MHz, *d*<sub>6</sub>-DMSO, ppm): δ 7.68 (d, 3H, *J*<sub>HH</sub> = 8.7 Hz, H<sup>a,d</sup>), 7.60 (d, 3H, *J*<sub>HH</sub> = 8.0 Hz, H<sup>a</sup>), 7.12 (d, 9H, *J*<sub>HH</sub> = 8.8 Hz, H<sup>5</sup> & H<sup>b,c</sup>), 6.40 (t, 3H, *J*<sub>HH</sub> = 7.3 Hz, H<sup>6</sup>), 6.24 (d, 3H, *J*<sub>HH</sub> = 8.2 Hz, H<sup>7</sup>), 5.45 (s, 6H, -CH<sub>2</sub>-), 3.84 (s, 9H, -OCH<sub>3</sub>), 2.43 (d, 6H, *J*<sub>HH</sub> = 7.2 Hz, -CH<sub>2</sub>-CH<sub>3</sub>), and 0.45 (t, 9H, *J*<sub>HH</sub> = 6.7 Hz, -CH<sub>2</sub>-CH<sub>3</sub>). <sup>13</sup>C NMR (100 MHz, *d*<sub>6</sub>-DMSO/CDCl<sub>3</sub>, ppm): δ 160.79, 154.16, 145.30, 143.21, 134.79, 131.47, 130.79, 122.73, 122.56, 121.59, 119.40, 114.32, 111.96 (aromatic), 55.56 (-OCH<sub>3</sub>), 44.89 (-CH<sub>2</sub>-), 23.29 and 14.59 (-CH<sub>2</sub>-CH<sub>3</sub>). HR-MS (*m/z*): Calc. for C<sub>57</sub>H<sub>55</sub>N<sub>6</sub>O<sub>3</sub> (M+H)<sup>+</sup>: 871.4336; found, 871.4336. Anal. Calc. for C<sub>57</sub>H<sub>54</sub>N<sub>6</sub>O<sub>3</sub>: C, 78.59; H, 6.25; N, 9.65. Found: C, 78.45; H, 6.31, N, 9.58.

**1,3,5-Tris(2-(3,4-dimethoxyphenyl)benzimidazol-1-ylmethyl)benzene (4):** According to the general procedure, 417 mg of product was prepared from L<sup>2</sup> (427.5 mg, 1.6812 mmol), NaH (49.0 mg, 2.01 mmol), 1,3,5-tris(bromomethyl)benzene (200 mg, 0.5604 mmol) and obtained as white solid. Yield: 85%. <sup>1</sup>H-NMR (500 MHz, *d*<sub>6</sub>-DMSO, ppm): δ 7.68 (d, 3H, *J*<sub>HH</sub> = 8.0 Hz, H<sup>a</sup>), 7.23 (t, 3H, *J*<sub>HH</sub> = 7.5 Hz, H<sup>5</sup>), 7.18 (d, 3H, *J*<sub>HH</sub> = 7.9 Hz, H<sup>6</sup>), 7.14 (d, 3H, *J*<sub>HH</sub> = 7.4 Hz, H<sup>7</sup>), 7.05 (d, 3H, *J*<sub>HH</sub> = 1.7 Hz, H<sup>a</sup>), 6.85 (dd, 3H, *J*<sub>HH</sub> = 8.3 and 1.9 Hz, H<sup>c</sup>), 6.74 (d, 3H, *J*<sub>HH</sub> = 8.4 Hz, H<sup>d</sup>), 6.68 (s, 3H, arene), 5.37 (s, 6H, -CH<sub>2</sub>-), 3.77 (s, 9H, -OCH<sub>3</sub>), and 3.49 (s, 9H, -OCH<sub>3</sub>). <sup>13</sup>C NMR (100 MHz, *d*<sub>6</sub>-DMSO, ppm): δ 153.66, 150.29, 148.88, 143.06, 138.98, 136.16, 123.56, 122.81, 122.51, 121.90, 119.52, 112.54, 111.78, 110.99 (aromatic), 55.94 and 55.57 (-OCH<sub>3</sub>), 47.76 (-CH<sub>2</sub>-). HR-MS (*m/z*): Calc. for C<sub>54</sub>H<sub>49</sub>N<sub>6</sub>O<sub>6</sub> (M+H)<sup>+</sup>: 877.3714; found, 877.3713. Anal. Calc. for C<sub>54</sub>H<sub>48</sub>N<sub>6</sub>O<sub>6</sub>: C, 73.95; H, 5.52; N, 9.58 Found: C, 73.85; H, 5.46; N, 9.48.

**1,3,5-Tris(2-(3,4-dimethoxyphenyl)benzimidazol-1-ylmethyl)-2,4,6-trimethylbenzene (5):** According to general procedure, 623 mg of product was prepared from L<sup>2</sup> (573.6 mg, 2.2558 mmol), NaH (65.0 mg, 2.70 mmol), 1,3,5-tris(bromomethyl)-2,4,6-trimethylbenzene (300 mg, 0.7519 mmol) and obtained as white solid. Yield: 90%. <sup>1</sup>H-NMR (500 MHz, *d*<sub>6</sub>-DMSO, ppm): δ 7.60 (d, 3H, *J*<sub>HH</sub> = 7.6 Hz, H<sup>a</sup>), 7.33-7.32 (m, 6H, H<sup>a,d</sup>), 7.10-7.07 (m, 6H, H<sup>5</sup> & H<sup>c</sup>), 6.60 (t, 3H, *J*<sub>HH</sub> = 7.6 Hz, H<sup>6</sup>), 6.30 (d, 3H, *J*<sub>HH</sub> = 8.1 Hz, H<sup>7</sup>), 5.51 (s, 6H, -CH<sub>2</sub>-), 3.82 (s, 9H, -OCH<sub>3</sub>), 3.80 (s, 9H, -OCH<sub>3</sub>), and 1.87 (s, 9H, -CH<sub>3</sub>). <sup>13</sup>C NMR (100 MHz, *d*<sub>6</sub>-DMSO, ppm): δ 154.45, 150.43, 149.00, 143.11, 138.24, 134.99, 131.60, 123.27, 122.95, 122.54, 121.74, 119.43, 113.50, 111.82, 111.51 (aromatic), 56.13 and 56.00 (-OCH<sub>3</sub>), 46.13 (-CH<sub>2</sub>-) and 16.79 (-CH<sub>3</sub>). HR-MS (*m/z*): Calc. for C<sub>57</sub>H<sub>55</sub>N<sub>6</sub>O<sub>6</sub> (M+H)<sup>+</sup>: 919.4183; found, 919.4184. Anal. Calc. for C<sub>57</sub>H<sub>54</sub>N<sub>6</sub>O<sub>6</sub>: C, 74.49; H, 5.92; N, 9.14. Found: C, 74.32; H, 5.85, N, 9.23.

**1,3,5-Tris(2-(3,4-dimethoxyphenyl)benzimidazol-1-ylmethyl)-2,4,6-triethylbenzene (6):** According to general procedure, 390 mg of product was prepared from L<sup>2</sup> (345.9 mg, 1.3604 mmol), NaH (39.0 mg, 1.63 mmol), 1,3,5-tris(bromomethyl)-2,4,6-triethylbenzene (200 mg, 0.4534 mmol) and obtained as white solid. Yield: 90%. <sup>1</sup>H NMR (400 MHz, *d*<sub>6</sub>-DMSO, ppm): δ 7.59 (d, 3H, *J*<sub>HH</sub> = 8.1 Hz, H<sup>a</sup>), 7.40-7.34 (m, 6H, H<sup>a,d</sup>), 7.16-7.08 (m, 6H, H<sup>5</sup> & H<sup>c</sup>), 6.39 (br s, 3H, H<sup>6</sup>), 6.22 (d, 3H, *J*<sub>HH</sub> = 8.1 Hz, H<sup>7</sup>), 5.48 (s, 6H, -CH<sub>2</sub>-), 3.84 (s, 9H, -OCH<sub>3</sub>), 3.81 (s, 9H, -OCH<sub>3</sub>), 2.46 (s, 6H, -CH<sub>2</sub>-CH<sub>3</sub>), and 0.49 (s, 9H, -CH<sub>2</sub>-CH<sub>3</sub>). <sup>13</sup>C NMR (100 MHz, CDCl<sub>3</sub>, ppm): δ 153.92, 150.56, 149.37, 145.28, 143.16, 134.54, 130.68, 123.12, 122.83, 122.36, 122.09, 119.89, 112.95, 111.58, 110.88 (aromatic), 56.22 and 56.01 (-OCH<sub>3</sub>), 44.95 (-CH<sub>2</sub>-), 29.70 and 14.12 (-CH<sub>2</sub>-CH<sub>3</sub>). HR-MS (*m/z*): Calc. for C<sub>60</sub>H<sub>61</sub>N<sub>6</sub>O<sub>6</sub> (M+H)<sup>+</sup>: 961.4653; found, 961.4653. Anal. Calc. for C<sub>60</sub>H<sub>60</sub>N<sub>6</sub>O<sub>6</sub>: C, 74.98; H, 6.29; N, 8.74. Found: C, 74.83; H, 6.21, N, 8.86.

**1,3,5-Tris(2-(3,4,5-trimethoxyphenyl)benzimidazol-1-ylmethyl)benzene (7):** According to the general procedure 436 mg of product was prepared from L<sup>3</sup> (477.9 mg, 1.6812 mmol), NaH (48.0 mg, 2.02 mmol), 1,3,5-tris(bromomethyl) benzene (200 mg, 0.5604 mmol) and obtained as white solid. Yield: 80%. <sup>1</sup>H-NMR (500 MHz, *d*<sub>6</sub>-DMSO, ppm): δ 7.64 (d, 3H, *J*<sub>HH</sub> = 8.0 Hz, H<sup>4</sup>), 7.22-7.18 (m, 3H, H<sup>5</sup>), 7.10-7.07 (m, 6H, H<sup>6-7</sup>), 6.80 (s, 6H, H<sup>a,d</sup>), 6.62 (s, 3H, arene) and 5.43 (s, 6H, -CH<sub>2</sub>-), 3.68 (s, 9H, -OCH<sub>3</sub>), and 3.52 (s, 18H, -OCH<sub>3</sub>). <sup>13</sup>C NMR (100 MHz, *d*<sub>6</sub>-DMSO, ppm): δ 153.33, 153.30, 142.85, 139.04, 136.15, 125.50, 123.22, 122.99, 122.64, 119.61, 110.88, 106.70 (aromatic), 60.49 and 56.05 (-OCH<sub>3</sub>) and 47.81 (-CH<sub>3</sub>). HR-MS (*m/z*): Calc. for C<sub>57</sub>H<sub>55</sub>N<sub>6</sub>O<sub>9</sub> (M+H)<sup>+</sup>: 967.4031; found, 967.4032. Anal. Calc. for C<sub>57</sub>H<sub>54</sub>N<sub>6</sub>O<sub>9</sub>: C, 70.79; H, 5.63; N, 8.69. Found: C, 70.65; H, 5.71, N, 8.59.

**1,3,5-Tris(2-(3,4,5-trimethoxyphenyl)benzimidazol-1-ylmethyl)-2,4,6-trimethylbenzene (8):** According to the general procedure 321 mg of product was prepared from L<sup>3</sup> (427.5 mg, 1.5039 mmol), NaH (43.3 mg, 1.80 mmol), 1,3,5-tris(bromomethyl)-2,4,6-trimethylbenzene (200 mg, 0.5013 mmol) and obtained as white solid. Yield: 81%. <sup>1</sup>H-NMR (500 MHz, *d*<sub>6</sub>-DMSO, ppm): δ 7.60 (d, 3H, *J*<sub>HH</sub> = 8.0 Hz, H<sup>4</sup>), 7.11 (t, 3H, *J*<sub>HH</sub> = 7.6 Hz, H<sup>5</sup>), 6.98 (s, 6H, H<sup>a,d</sup>), 6.65 (t, 3H, *J*<sub>HH</sub> = 7.4 Hz, H<sup>6</sup>), 6.42 (d, 3H, *J*<sub>HH</sub> = 8.2 Hz, H<sup>7</sup>), 5.51 (s, 6H, -CH<sub>2</sub>-), 3.79 (s, 18H, -OCH<sub>3</sub>), 3.71 (s, 9H, -OCH<sub>3</sub>), and 1.85 (s, 9H, -CH<sub>3</sub>). <sup>13</sup>C NMR (100 MHz, *d*<sub>6</sub>-DMSO, ppm): δ 154.31, 153.19, 142.94, 138.97, 138.12, 135.08, 131.53, 126.48, 122.73, 121.88, 119.56, 111.48, 107.65 (aromatic), 60.51 and 56.51 (-OCH<sub>3</sub>), 45.90 (-CH<sub>2</sub>-), 16.90 (-CH<sub>3</sub>). HR-MS (*m/z*): Calc. for C<sub>60</sub>H<sub>61</sub>N<sub>6</sub>O<sub>9</sub> (M+H)<sup>+</sup>: 1009.4500; found, 1009.4510. Anal. Calc. for C<sub>60</sub>H<sub>60</sub>N<sub>6</sub>O<sub>9</sub>: C, 71.41; H, 5.99; N, 8.33. Found: C, 71.28; H, 5.92, N, 8.41.

**1,3,5-Tris(2-(3,4,5-trimethoxyphenyl)benzimidazol-1-ylmethyl)-2,4,6-triethylbenzene (9):** According to the general procedure 368 mg of product was prepared from L<sup>3</sup> (386.7 mg, 1.3604 mmol), NaH (39.0 mg, 1.63 mmol), 1,3,5-tris(bromomethyl)-2,4,6-triethylbenzene (200 mg, 0.4534 mmol) and obtained as white solid. Yield: 78%. <sup>1</sup>H NMR (500 MHz, *d*<sub>6</sub>-DMSO, ppm): δ 7.62 (d, 3H, *J*<sub>HH</sub> = 8.0 Hz, H<sup>4</sup>), 7.12 (t, 3H, *J*<sub>HH</sub> = 7.6 Hz, H<sup>5</sup>), 7.09 (s, 6H, H<sup>a,d</sup>), 6.46 (br s, 3H, H<sup>6</sup>), 6.34 (br d, 3H, *J*<sub>HH</sub> = 6.4 Hz, H<sup>7</sup>), 5.49 (s, 6H, -CH<sub>2</sub>-), 3.81 (s, 18H, -OCH<sub>3</sub>), 3.73 (s, 9H, -OCH<sub>3</sub>), 2.49 (s, 6H, -CH<sub>2</sub>-CH<sub>3</sub>), and 0.48 (s, 9H, -CH<sub>2</sub>-CH<sub>3</sub>). <sup>13</sup>C NMR (125 MHz, CDCl<sub>3</sub>, ppm): δ 148.92, 148.75, 138.22, 135.11, 134.12, 133.08, 130.72, 124.26, 123.45, 120.53, 120.09, 118.62, 118.55, 118.31, 115.48, 104.93, 101.84 (aromatic), 56.19 and 51.37 (-OCH<sub>3</sub>), 43.27 (-CH<sub>2</sub>-), 26.81 and 16.67 (-CH<sub>2</sub>-CH<sub>3</sub>). HR-MS (*m/z*): Calc. for C<sub>63</sub>H<sub>67</sub>N<sub>6</sub>O<sub>9</sub> (M+H)<sup>+</sup>: 1051.4970; found, 1051.4968. Anal. Calc. for C<sub>63</sub>H<sub>66</sub>N<sub>6</sub>O<sub>9</sub>: C, 71.98; H, 6.33; N, 7.99. Found: C, 71.85; H, 6.29, N, 7.88.

**X-ray Crystallography.** Intensity data of suitably sized crystals of **3** and **6** were carried out on a Bruker D8 QUEST diffractometer [ $\lambda(\text{Mo K}\alpha) = 0.71073 \text{ \AA}$ ] for unit cell determination and three-dimensional intensity data collection. The structures were solved by direct methods using SHELXS-97<sup>2</sup> which revealed the atomic positions and refined using the SHELXL-2014/7 program (within the WinGX program package).<sup>3</sup> Non-H atoms were refined anisotropically.

**Table S1.** Geometrical parameters ( $d$ , Å = distance between the COM of benzene of benzimidazolyl residues;  $\tau$ , ° = dihedral angle between the benzimidazolyl units) in the X-ray structures **I** (phenyl substituted porphyrin-Zn complex)<sup>2</sup>, **II-IV** (**II** = 1,3,5-tris(2-furyl)benzimidazol-1-ylmethyl)-2,4,6-triethylbenzene, **IIa** = optimized structure of **II**, **III** = 1,3,5-tris(2-thiophenyl)benzimidazol-1-ylmethyl)-2,4,6-triethylbenzene, **IV** = 1,3,5-tris(2-pyridyl)benzimidazol-1-ylmethyl)-2,4,6-triethylbenzene)<sup>4</sup>, and **6** (1,3,5-Tris(2-(3,4-dimethoxyphenyl)benzimidazol-1-ylmethyl)-2,4,6-trimethylbenzene).

|             | <b>I</b>                                               | <b>II</b>                                                                          | <b>IIa</b>                                                                          | <b>III</b>                                                                           | <b>IV</b>                                                                            | <b>6</b>                                                                             |
|-------------|--------------------------------------------------------|------------------------------------------------------------------------------------|-------------------------------------------------------------------------------------|--------------------------------------------------------------------------------------|--------------------------------------------------------------------------------------|--------------------------------------------------------------------------------------|
| $d_{ab}$    | 4.973(4)                                               | 5.13                                                                               | 5.74                                                                                | 5.09                                                                                 | 5.30                                                                                 | 4.88                                                                                 |
| $d_{bc}$    | 4.623(4)                                               | 5.19                                                                               | 5.77                                                                                | 5.40                                                                                 | 5.07                                                                                 | 4.88                                                                                 |
| $d_{ac}$    | 5.004(4)                                               | 5.06                                                                               | 5.76                                                                                | 5.43                                                                                 | 4.97                                                                                 | 4.88                                                                                 |
| $\tau_{ab}$ | 67.7(3)                                                | 64                                                                                 | 60                                                                                  | 65                                                                                   | 56                                                                                   | 60                                                                                   |
| $\tau_{bc}$ | 32.7(3)                                                | 54                                                                                 | 59                                                                                  | 59                                                                                   | 62                                                                                   | 60                                                                                   |
| $\tau_{ca}$ | 59.2(3)                                                | 61                                                                                 | 60                                                                                  | 55                                                                                   | 62                                                                                   | 60                                                                                   |
|             | [phenyl substituted porphyrin-Zn complex] <sub>3</sub> | 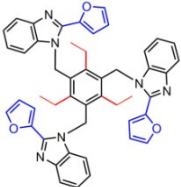 |  |  |  |  |

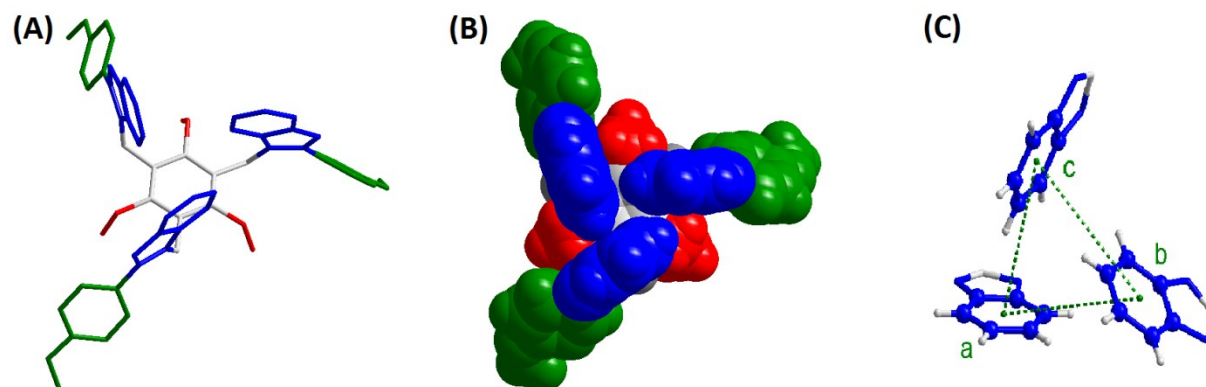

**Fig. S1** Molecular structures of **3** (A: stick model, H-atoms are removed; B: space-filling model; C: Three benzimidazolyl units of **3**). a, b and c are the COM of benzene ring. (Color code: methoxyphenyl = green, ethyl = red, benzene = grey, benzimidazolyl = blue, and H atoms in C = grey).

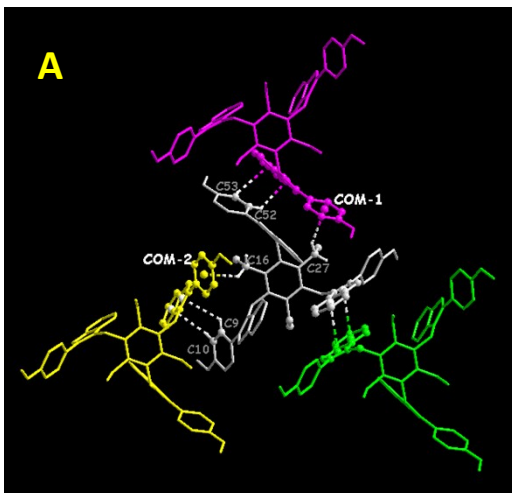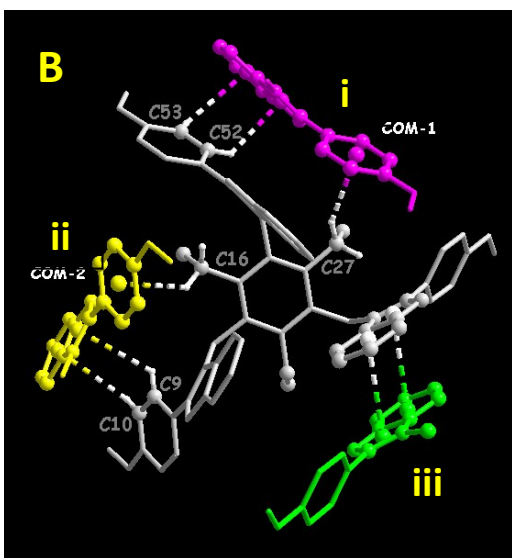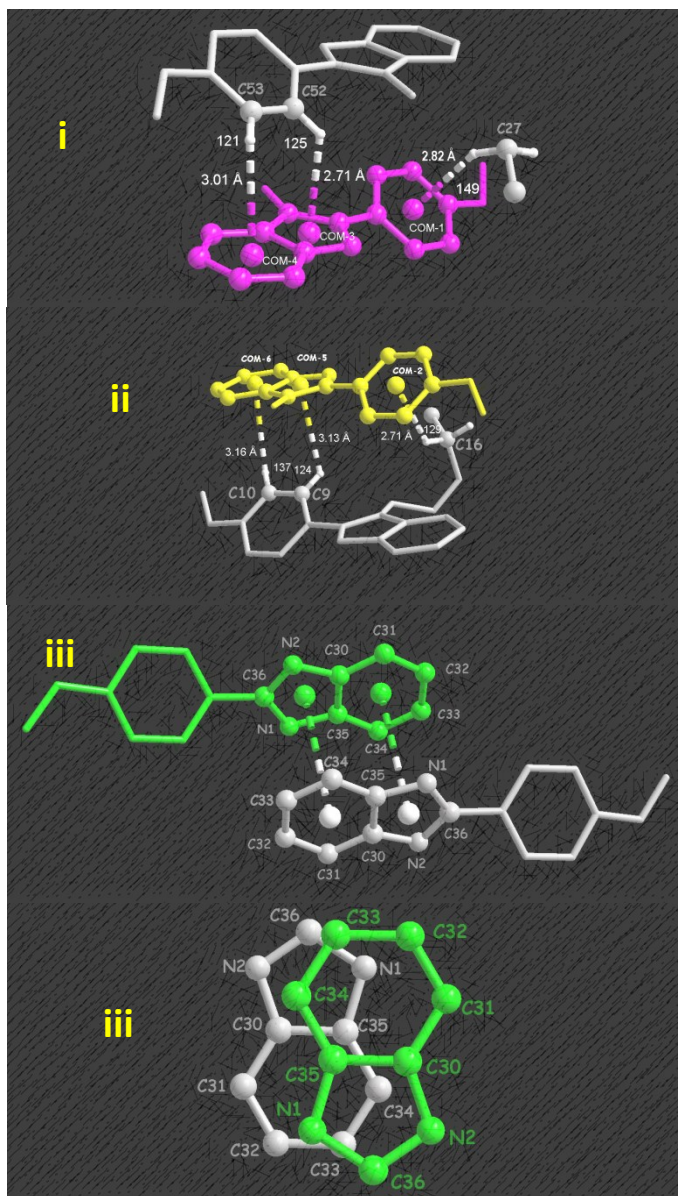

|                           | I             |                                            |                           | II            |                                            | III       |               |
|---------------------------|---------------|--------------------------------------------|---------------------------|---------------|--------------------------------------------|-----------|---------------|
|                           | $d, \text{Å}$ | $\angle\text{C-H}\cdots\text{COM}, ^\circ$ |                           | $d, \text{Å}$ | $\angle\text{C-H}\cdots\text{COM}, ^\circ$ | Cg... Cw  | $d, \text{Å}$ |
| <sup>a</sup> C27-H...COM1 | 2.82          | 149                                        | <sup>a</sup> C16-H...COM2 | 2.71          | 129                                        | C33...C36 | 3.4808        |
| C52-H...COM3              | 2.71          | 125                                        | C9-H...COM5               | 3.13          | 124                                        | C34...C30 | 3.5796        |
| C53-H...COM4              | 3.01          | 121                                        | C10-H...COM2              | 3.16          | 137                                        | C34...C35 | 3.6413        |
|                           |               |                                            |                           |               |                                            | C35...C35 | 3.5299        |

a = alkyl carbon,  $d$  = distance, COM = center of mass of six membered ring (or) five membered ring, Cg = green color carbon, Cw = white color carbon.

**Fig. S2** Partial packing diagram showing four molecules of **3** (A). One full molecule with partial three molecules of **3** (B). I, II, and III are the portion of two neighboring methoxyphenylbenzimidazolyl units. Hydrogen atom is included only for carbon involving the C-H... $\pi$  interactions.



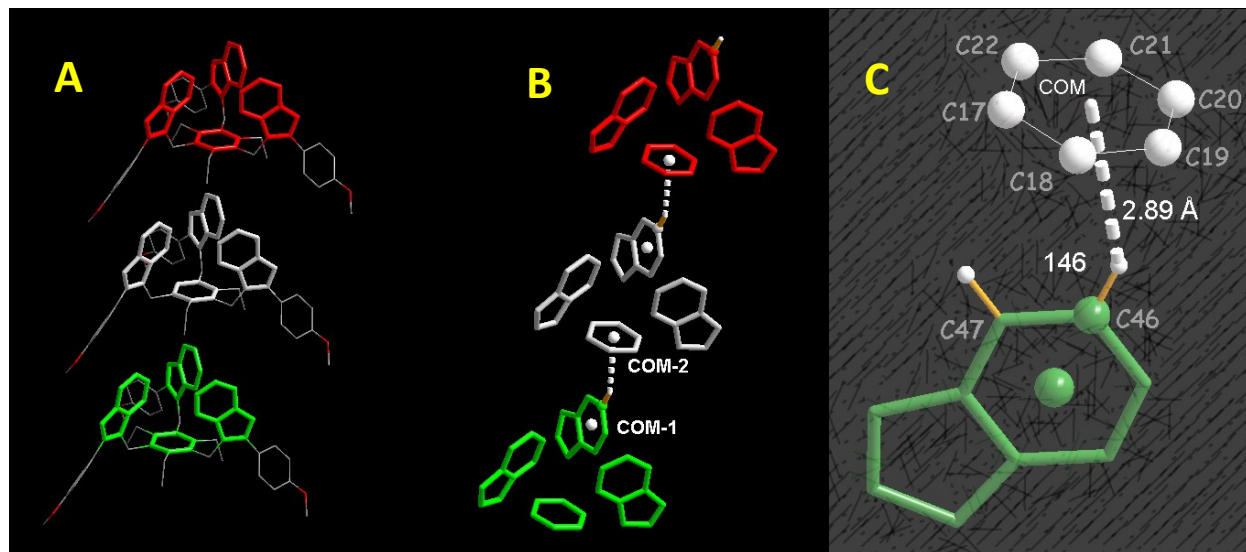

|                                           | $d, \text{Å}$ | $\angle\text{C-H}\cdots\text{COM}, ^\circ$ |
|-------------------------------------------|---------------|--------------------------------------------|
| $^{\text{a}}\text{COM1}\cdots\text{COM2}$ | 2.82          | 149                                        |
| C46-H $\cdots$ COM                        | 2.89          | 146                                        |
| C46-H $\cdots$ C17                        | 3.58          | 124                                        |
| C46-H $\cdots$ C18                        | 3.21          | 133                                        |
| C46-H $\cdots$ C19                        | 2.86          | 156                                        |
| C46-H $\cdots$ C20                        | 2.82          | 169                                        |
| C46-H $\cdots$ C21                        | 3.16          | 142                                        |
| C46-H $\cdots$ C22                        | 3.54          | 128                                        |

**Fig. S3** Partial packing diagram showing three adjacent molecules of **3** (A). Spacer benzene and CBT core (B). Two aromatic units indicate the intermolecular *edge-to-face* C-H $\cdots$  $\pi$  interactions. Hydrogen atom is included only for carbon involving the C-H $\cdots$  $\pi$  interactions.

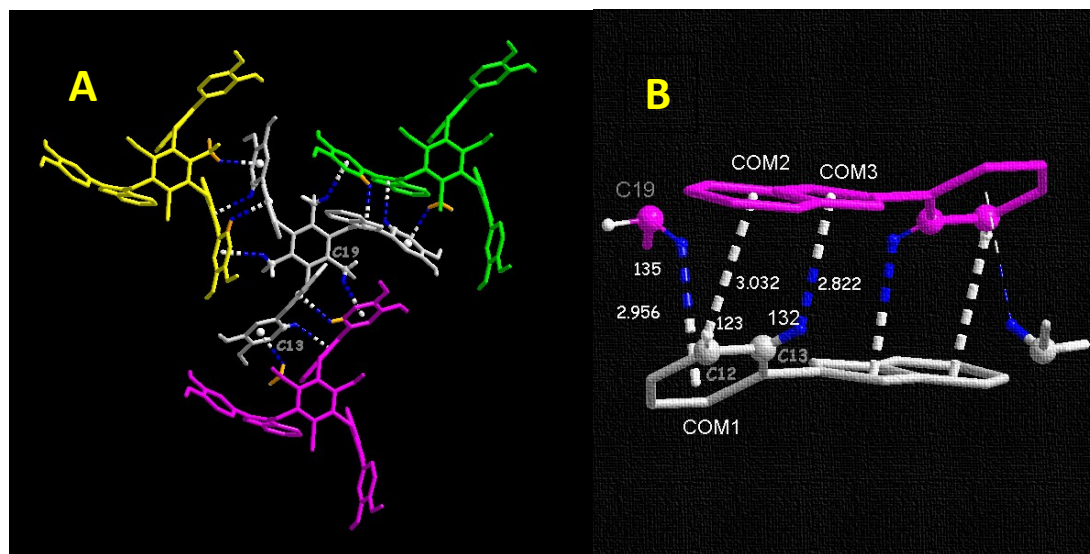

|                                            | $d, \text{Å}$ | $\angle \text{C-H}\cdots\text{COM}, ^\circ$ |
|--------------------------------------------|---------------|---------------------------------------------|
| $^{\text{a}}\text{C19-H}\cdots\text{COM1}$ | 2.956         | 135                                         |
| $\text{C12-H}\cdots\text{COM2}$            | 3.032         | 123                                         |
| $\text{C13-H}\cdots\text{COM4}$            | 2.822         | 132                                         |

**Fig. S4** Partial packing diagram showing four molecules of **6** (A). Two neighboring phenylbenzimidazolyl units and  $\text{CH}_2$  unit in ethyl group involve in noncovalent interactions (B). Hydrogen atom is included only for carbon involving the  $\text{C-H}\cdots\pi$  interactions.

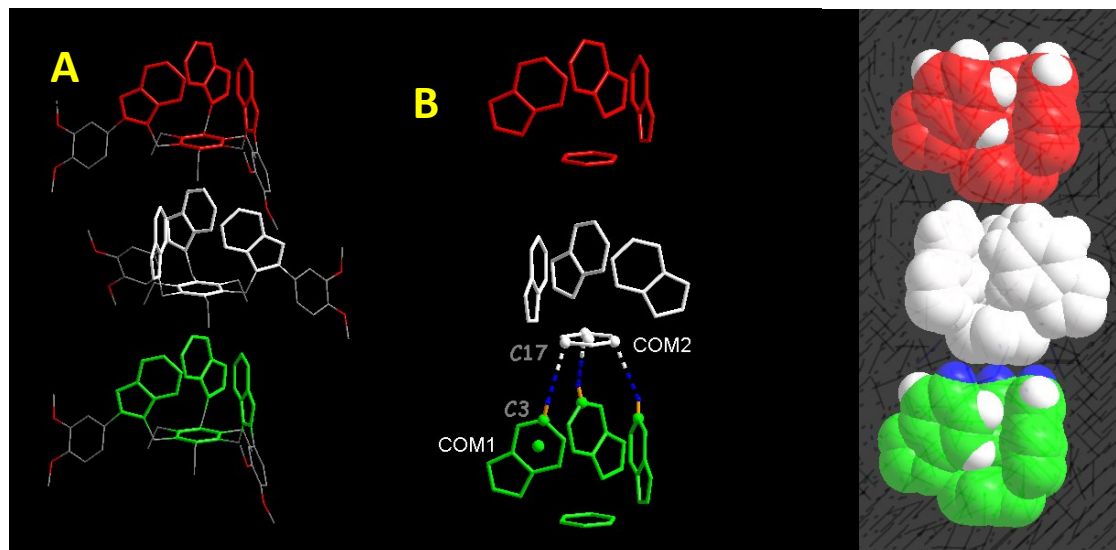

|                                         | $d, \text{\AA}$ |                                                   |
|-----------------------------------------|-----------------|---------------------------------------------------|
| $\angle \text{COM1} \cdots \text{COM2}$ | 5.7918          | $\tau = 86^\circ$                                 |
| $\text{C3-H} \cdots \text{COM2}$        | 3.078           | $\angle \text{C-H} \cdots \text{COM} = 156^\circ$ |

**Fig. S5** Partial packing diagram showing three adjacent molecules of **6** (A). Spacer benzene and CBT core (B). CBT trimer unit, three benzene units, contacts with benzene spacer by intermolecular *edge-to-face* C-H $\cdots$  $\pi$  interactions. Hydrogen atom is included only for carbon involving the C-H $\cdots$  $\pi$  interactions.

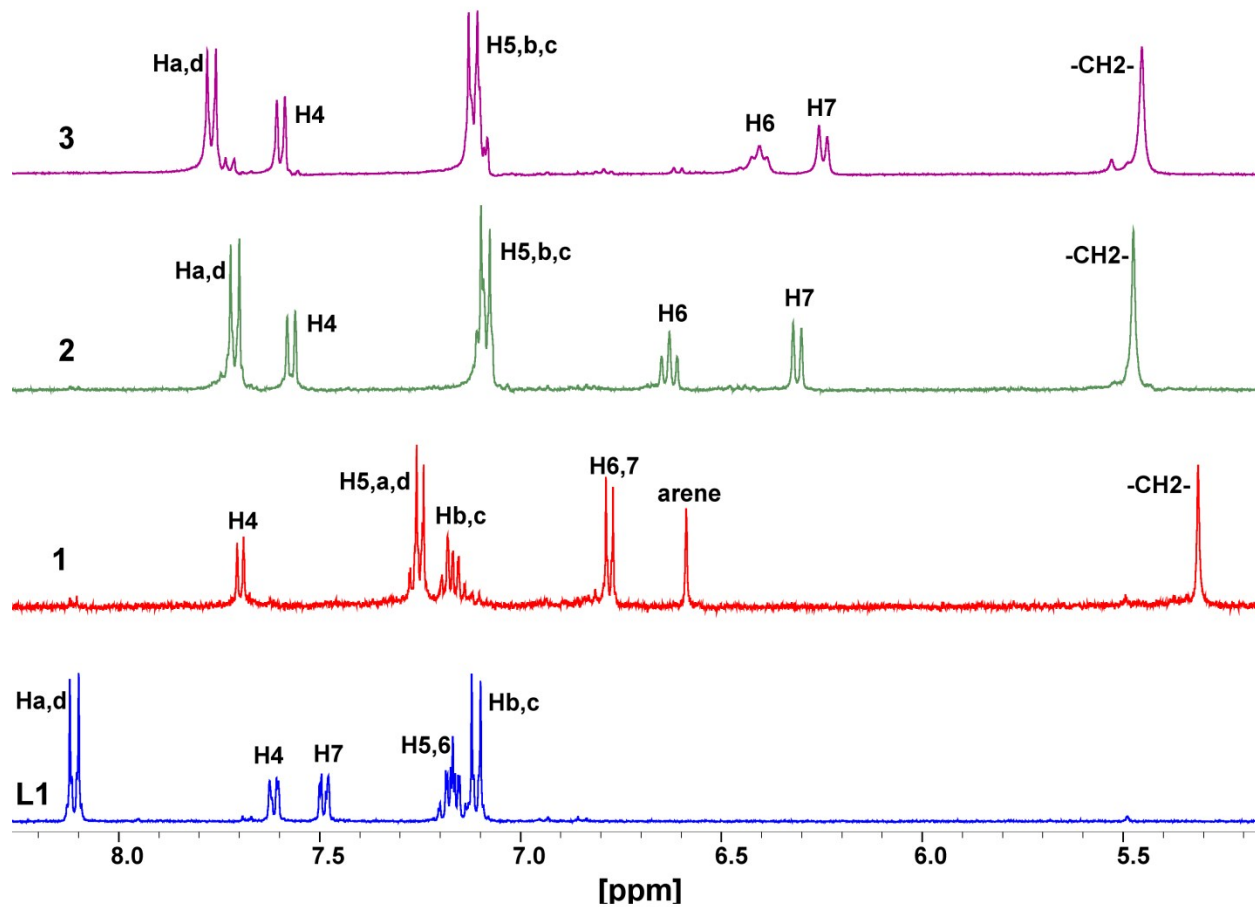

**Fig. S6** Partial  $^1\text{H}$  NMR spectra of **L1**, **1**, **2** and **3** in  $d_6$ -DMSO.

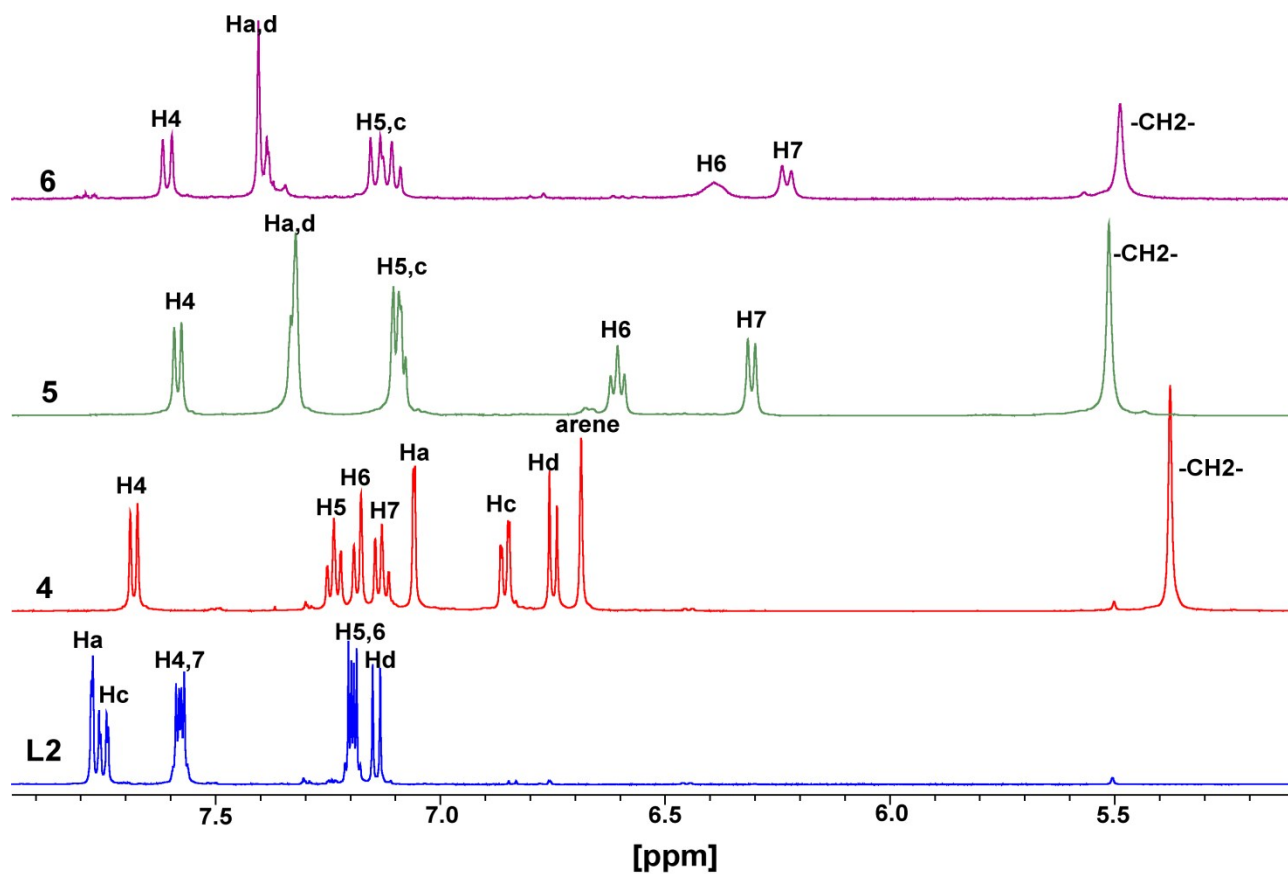

**Fig. S7** Partial  $^1\text{H}$  NMR spectra of L<sup>2</sup>, 4, 5 and 6 in  $d_6$ -DMSO.

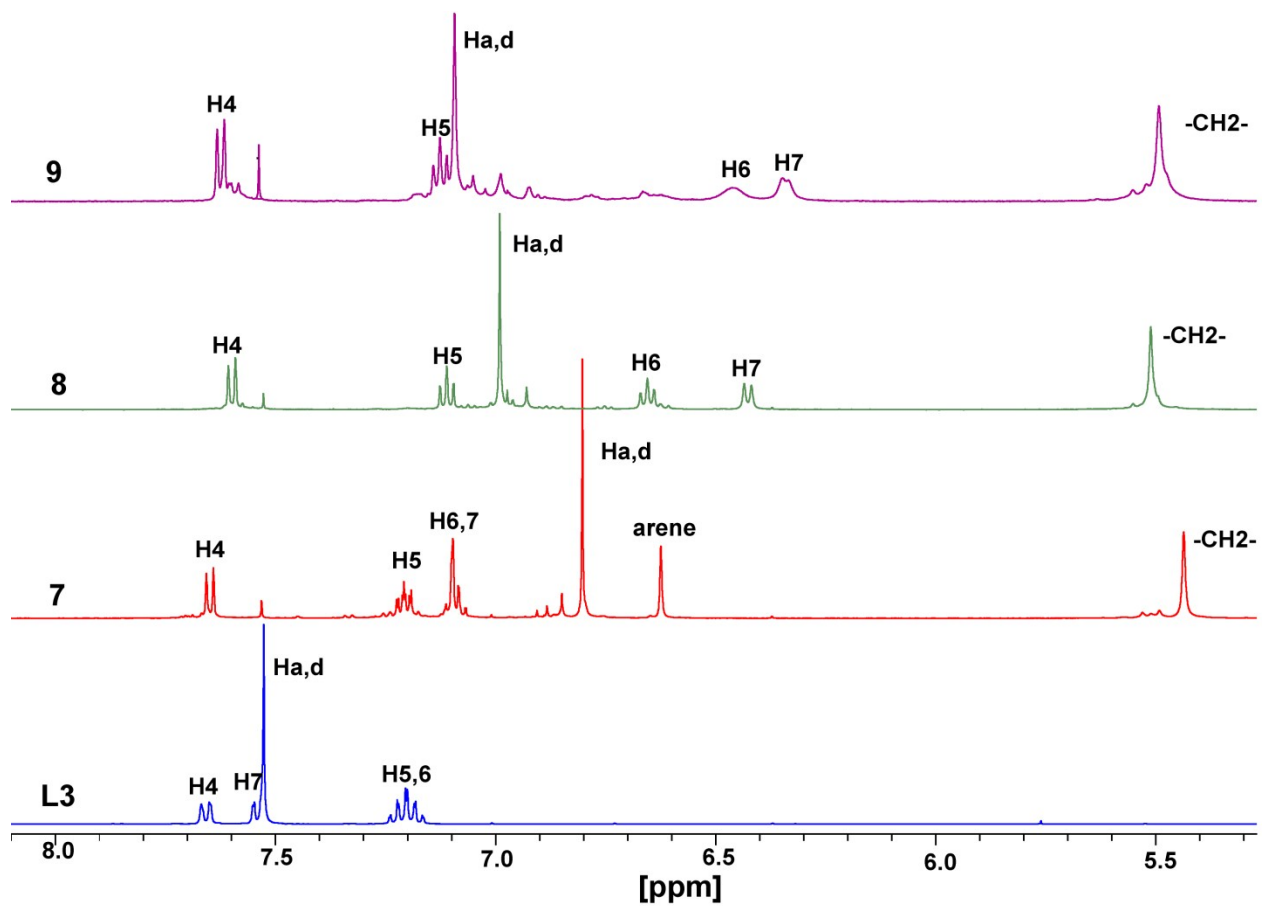

**Fig. S8** Partial  $^1\text{H}$  NMR spectra of  $\text{L}^3$ , **7**, **8** and **9** in  $d_6$ -DMSO.

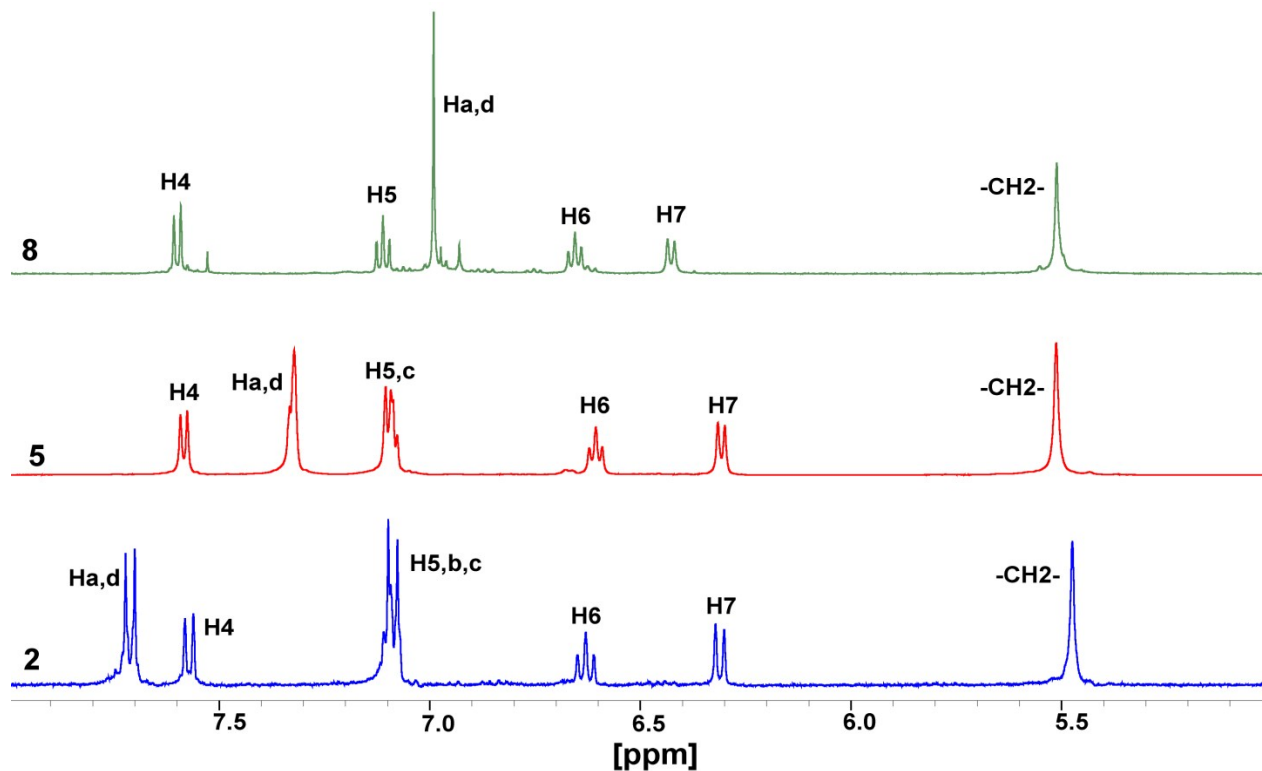

**Fig. S9** Partial  $^1\text{H}$  NMR spectra of **2**, **5** and **8** in  $d_6$ -DMSO.

The methoxyphenyl protons in these molecules also display significant upfield shifts in the  $^1\text{H}$  NMR spectra. The  $\text{H}^a$  and  $\text{H}^d$  of monomethoxyphenyl unit of molecule **2** remain almost same region relative to the free ligand ( $\delta$  6.69). Molecule **5** shows a merged peak ( $\delta$  7.33) for the  $\text{H}^a$  and  $\text{H}^d$ , which were appeared as two separate peaks ( $\delta$  7.77 and 7.14) in the free ligand. Compare to the molecule **2**, these two protons are slightly downfield shifted in **5**. This indicates that the dimethoxyphenyl units directed away to the center of molecule in **5** in compare to monomethoxyphenyl unit arrangement in **2**. In addition, it may be possible that the dimethoxyphenyl unit rotates in solution and  $\text{H}^a$  and  $\text{H}^d$  experience the similar chemical environment in the NMR time scale. Molecule **8** shows a sharp singlet for the  $\text{H}^a$  and  $\text{H}^d$  of trimethoxyphenyl unit, which was upfield shifted relative to free ligand. The peak position of these two protons in molecules **2** and **8** are in the similar region. The  $\text{H}^b$  and  $\text{H}^c$  of molecule **2** appeared at 7.6 ppm which was also significantly upfield shifted in compare to free ligand. Similar pattern was observed for  $\text{H}^c$  of molecule **5**.

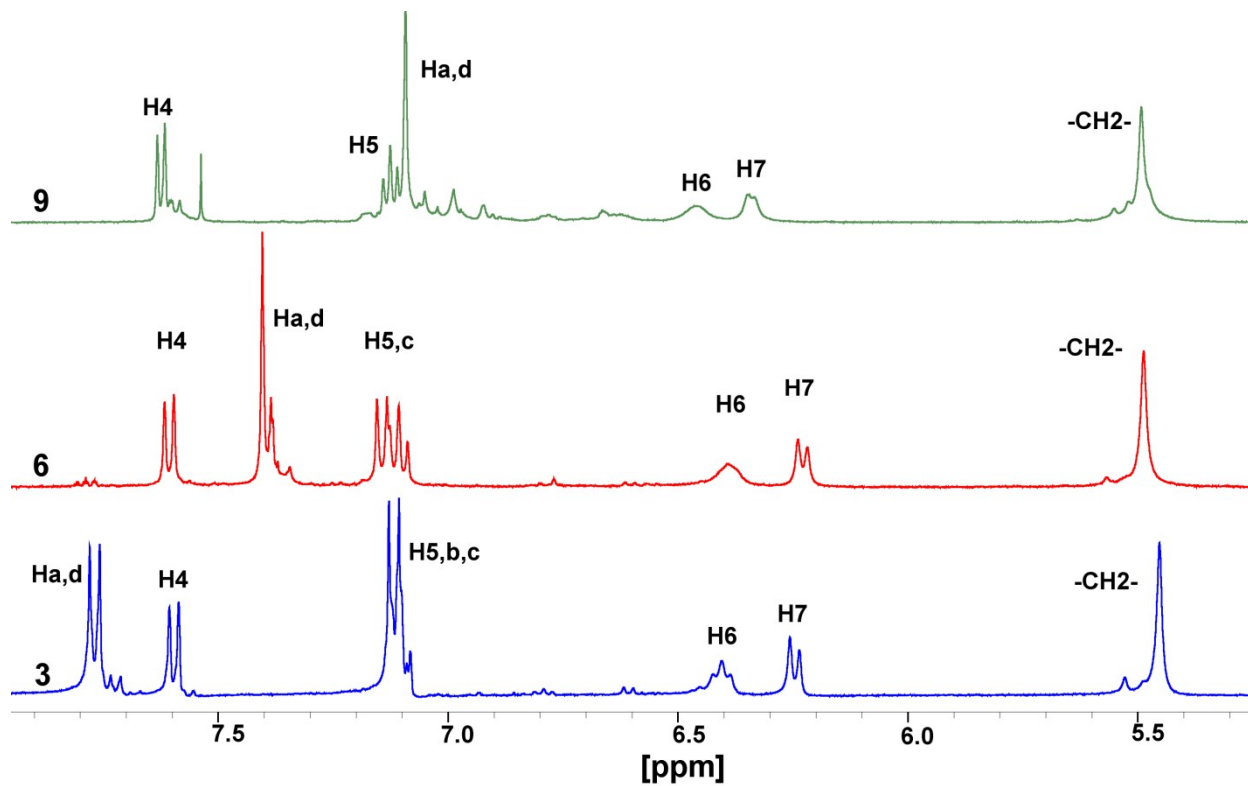

**Fig. S10** Partial  $^1\text{H}$  NMR spectra of **3**, **6** and **9** in  $d_6$ -DMSO.



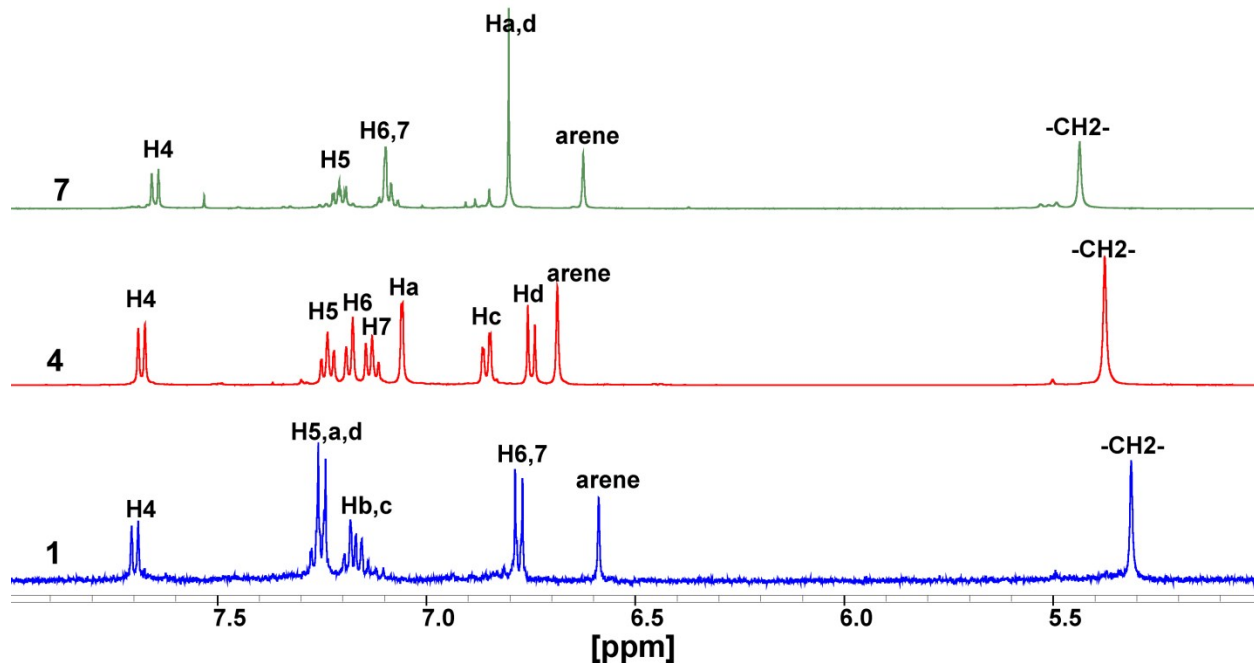

**Fig. S11** Partial  $^1\text{H}$  NMR spectra of **1**, **4** and **7** in  $d_6$ -DMSO.

Molecules with benzene center scaffold (**1**, **4** and **7**) show different pattern in compare to remaining molecules. Though these molecules **1**, **4** and **7** display a well-separated and a single set of peaks for all protons, assigning to a particular conformation based on the chemical resonances was fruitless. However, molecule **1** may exist as *syn*-conformer predominantly in the solution due to upfield shift observed for the  $\text{H}^6$  and  $\text{H}^7$  protons which are very close the values found for the same proton in methyl/ethyl substituted molecules.

Ch.Kiran Kumar KK MM HYD

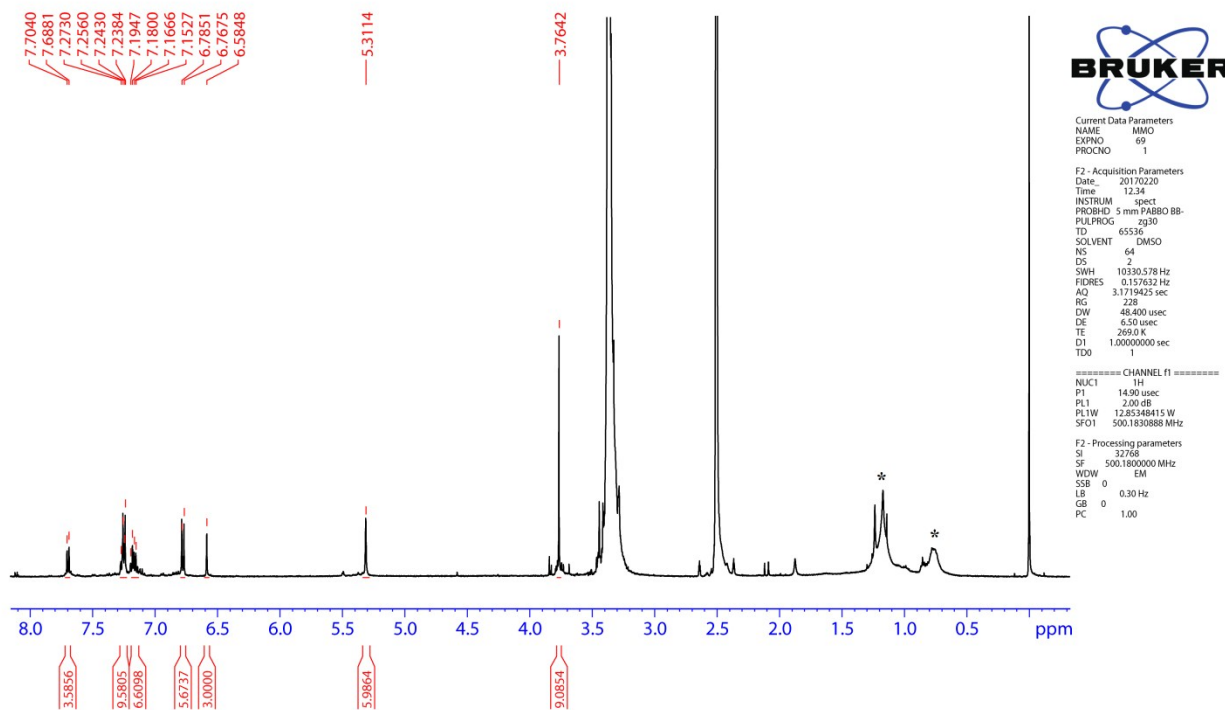

Fig. S12  $^1\text{H}$  NMR spectrum of **1** in  $d_6$ -DMSO (\* = residual solvent peaks).

KK-MM-HY

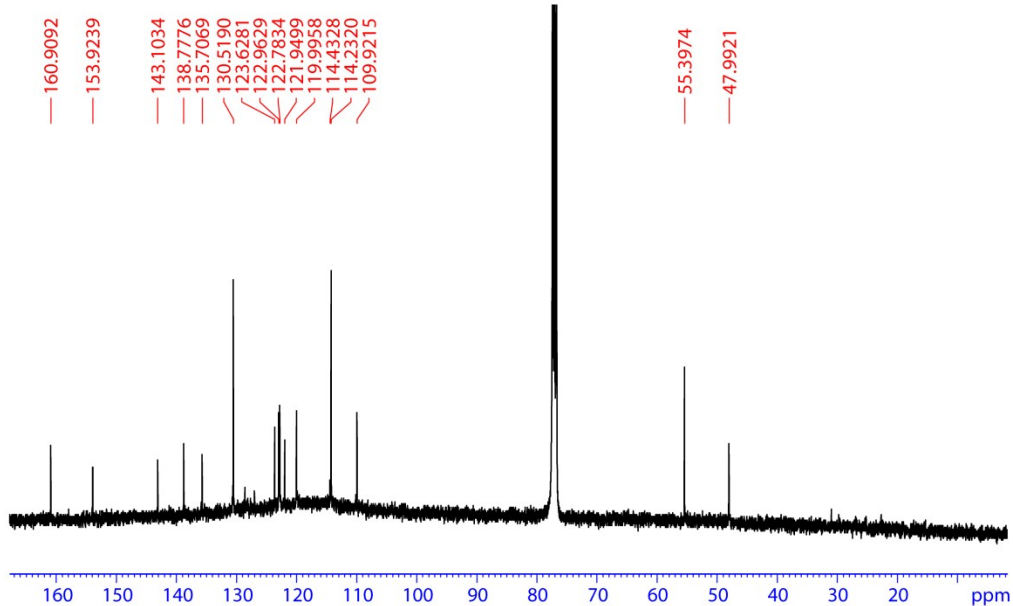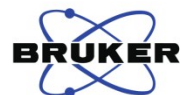

Current Data Parameters  
NAME MMO  
EXPNO 72  
PROCNO 1

F2 - Acquisition Parameters  
Date\_ 20170221  
Time 6:25  
INSTRUM spect  
PROBHD 5 mm BBI 1H/D-  
PULPROG zgpg30  
TD 65536  
SOLVENT CDCl3  
NS 16275  
DS 4  
SWH 24038.461 Hz  
FIDRES 0.356798 Hz  
AQ 1.3631488 sec  
RG 724  
DWT 20.800 usec  
DE 6.50 usec  
TE 295.0 K  
D1 2.0000000 sec  
D11 0.0300000 sec  
TD0 1

===== CHANNEL f1 =====  
NUC1 13C  
P1 15.00 usec  
PL1 -1.60 dB  
PL1W 113.28035736 W  
SFO1 100.6130223 MHz

===== CHANNEL f2 =====  
CPDPRG2 waltz16  
NUC2 1H  
PCPD2 80.00 usec  
PL2 1.20 dB  
PL12 21.20 dB  
PL13 21.20 dB  
PL2W 16.27263451 W  
PL12W 0.16272631 W  
PL13W 0.16272631 W  
SFO2 400.0926004 MHz

F2 - Processing parameters  
SI 32768  
SF 100.6029620 MHz  
WDW EM  
SSB 0  
LB 1.00 Hz  
GB 0  
PC 1.40

Fig. S13  $^{13}\text{C}$  NMR spectrum of **1** in  $\text{CDCl}_3$ .

Ch. Ki ran Kumar KK-MET

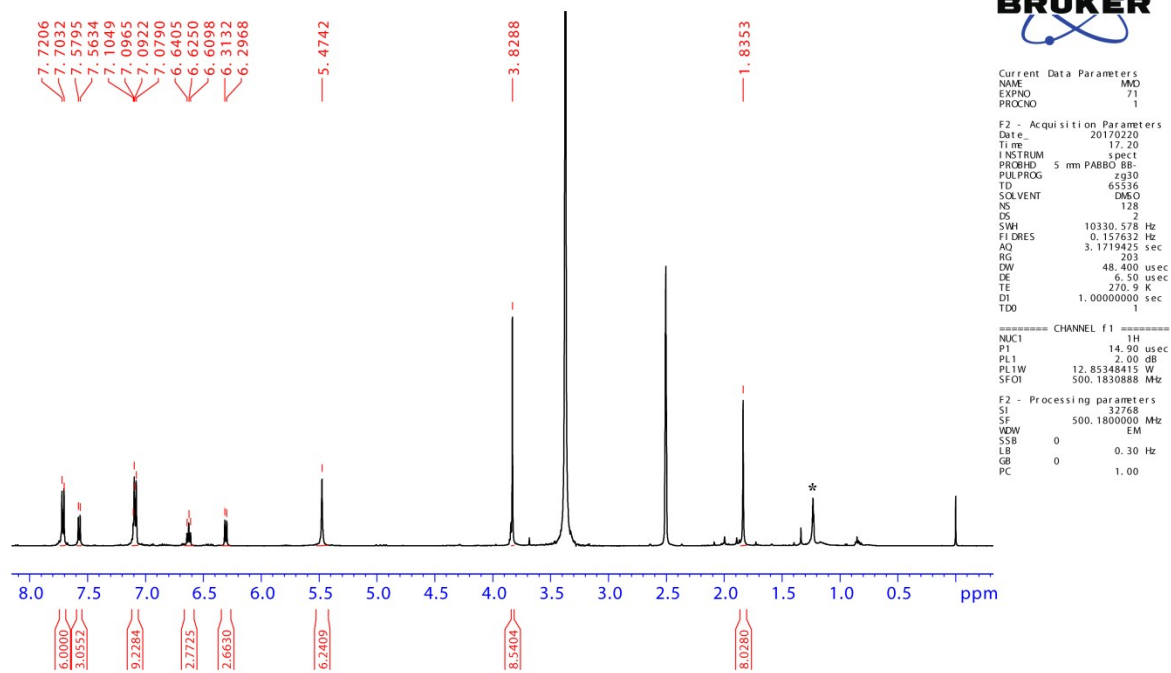

Fig. S14  $^1\text{H}$  NMR spectrum of **2** in  $d_6$ -DMSO (\* = residual solvent peak).

kk-mm-met

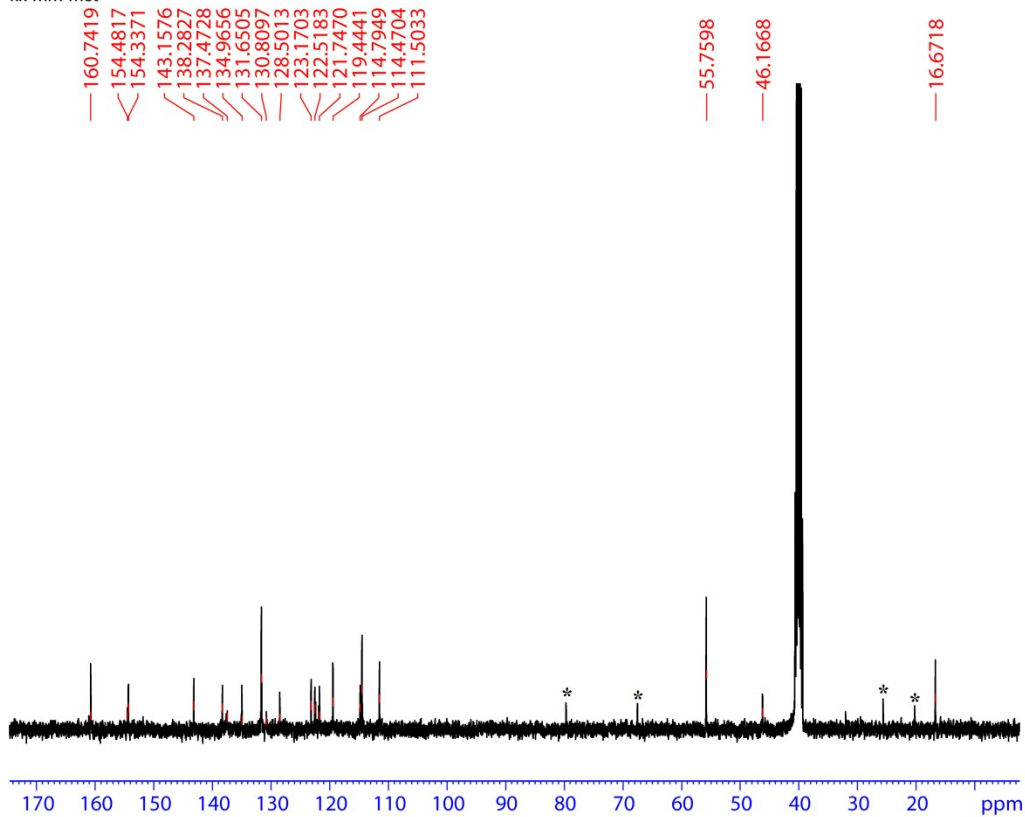

Fig. S15  $^{13}\text{C}$  NMR spectrum of **2** in  $d_6$ -DMSO (\* = residual solvent peaks).

kk-mm et h

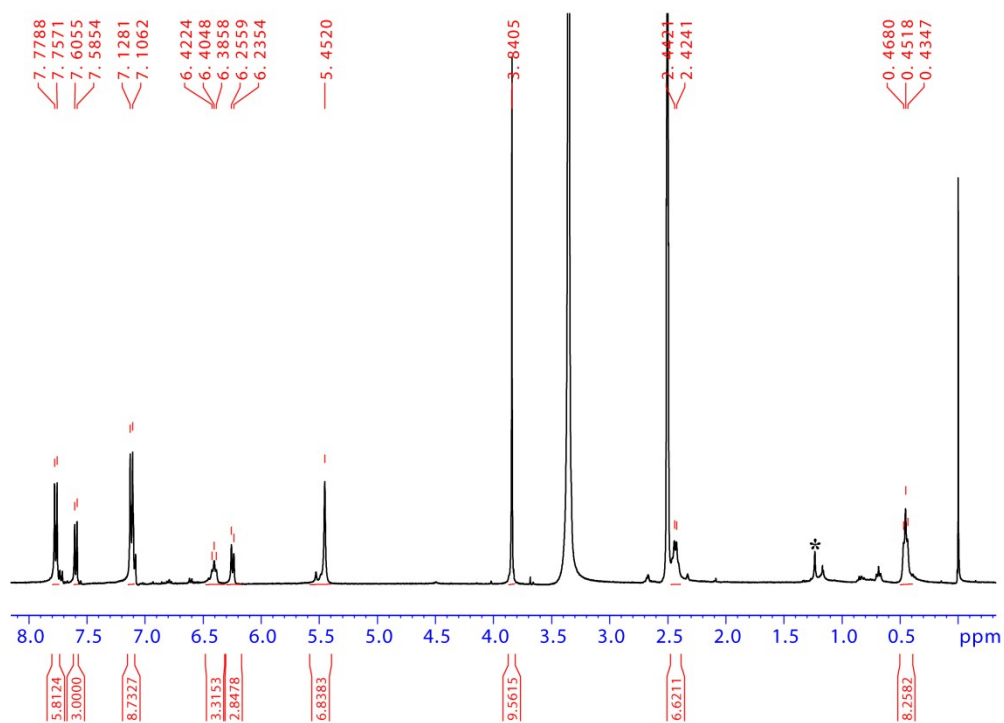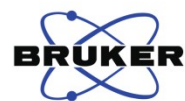

Current Data Parameters  
NAME MMO  
EXPNO 9  
PROCNO 1

F2 - Acquisition Parameters  
Date\_ 20170120  
Time 0.50  
INSTRUM spect  
PROBHD 5 mm BBI 1H/D-  
PULPROG zg30  
TD 65536  
SOLVENT DMSO  
NS 64  
DS 2  
SWH 8223.685 Hz  
FIDRES 0.125483 Hz  
AQ 3.9845889 sec  
RG 1030  
DW 60.800 usec  
DE 6.50 usec  
TE 298.5 K  
DI 1.0000000 sec  
TDO 1

===== CHANNEL f1 =====  
NUC1 1H  
P1 8.00 usec  
PL1 1.20 dB  
PL1W 16.27263451 W  
SFO1 400.0934707 MHz

F2 - Processing parameters  
SI 32768  
SF 400.0910000 MHz  
WDW EM  
SSB 0  
LB 0.30 Hz  
GB 0  
PC 1.00

Fig. S16  $^1\text{H}$  NMR spectrum of **3** in  $d_6$ -DMSO (\* = residual solvent peak).

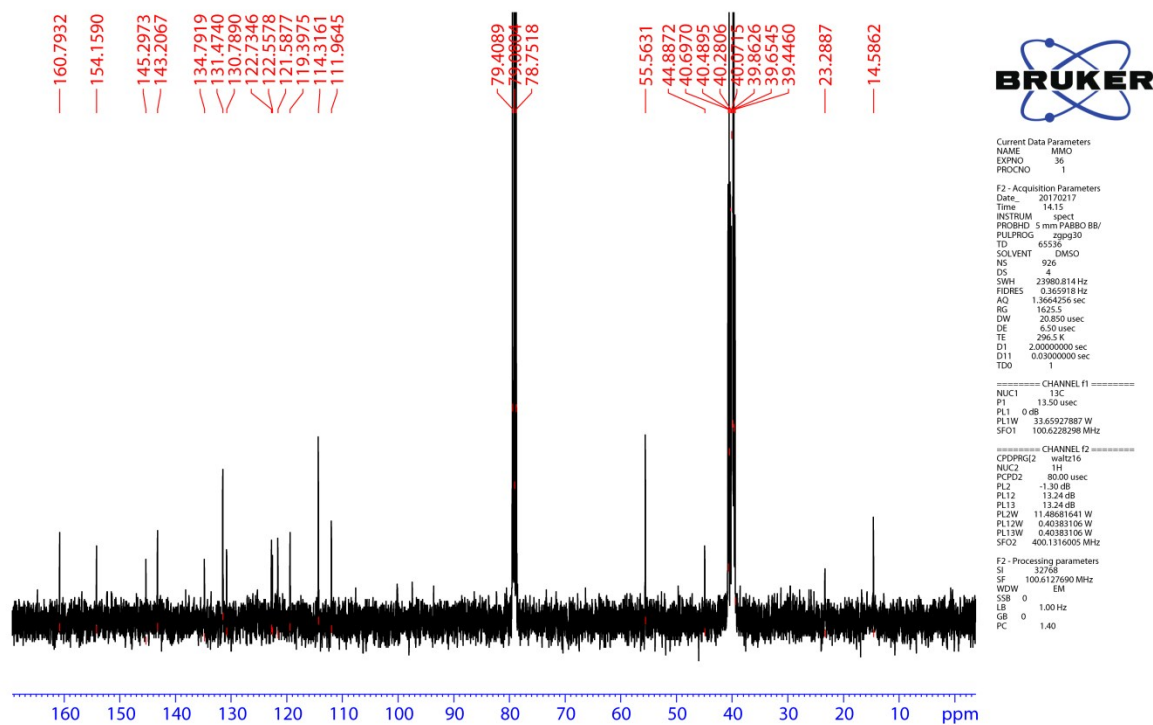

Fig. S17 <sup>13</sup>C NMR spectrum of **3** in CDCl<sub>3</sub>/d<sub>6</sub>-DMSO.

Kiran Kumar SDSA -127

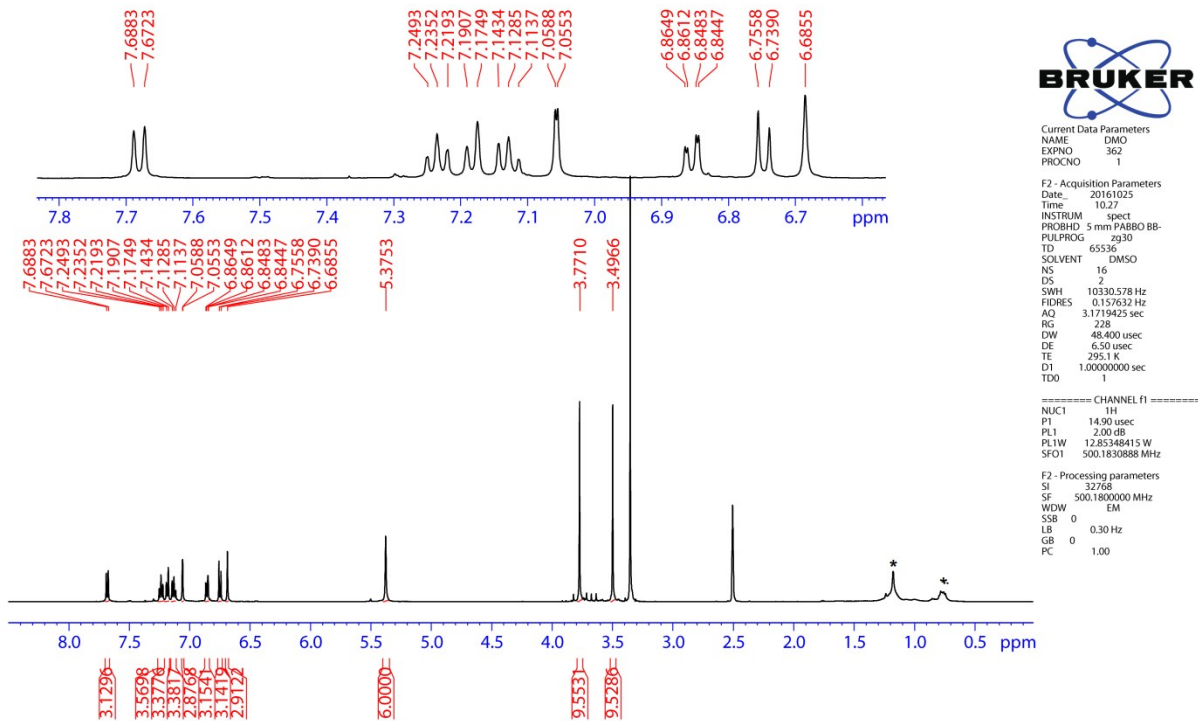

Fig. S18  $^1\text{H}$  NMR spectrum of **4** in  $d_6$ -DMSO (\* = residual solvent peaks).



SDSA-127

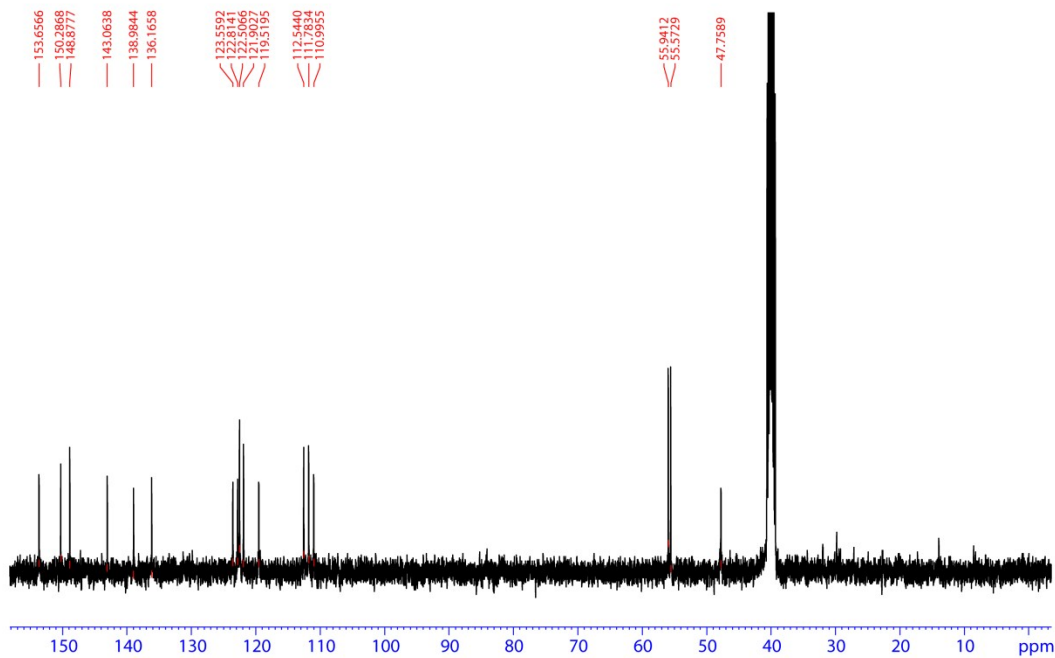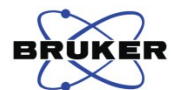

```
Current Data Parameters
NAME      DMO
EXPNO    17
PROCNO   1

F2 - Acquisition Parameters
Date_    20161029
Time     13:52
INSTRUM  spect
PROBHD   5 mm PABBO BB/
PULPROG  zgpg30
TD       65536
SOLVENT  DMSO
NS       757
DS       4
SWH      23980.814 Hz
FIDRES   0.365918 Hz
AQ       1.3664256 sec
RG       1149.4
DW       20.850 usec
DE       6.50 usec
TE       294.8 K
D1       2.00000000 sec
D11      0.03000000 sec
TDO      1

===== CHANNEL f1 =====
NUC1     13C
P1       13.50 usec
PL1      0 dB
PL1W     33.65927887 W
SFO1     100.6228298 MHz

===== CHANNEL f2 =====
CPDPRG2  waltz16
NUC2     1H
PCPD2    80.00 usec
PL2      -1.30 dB
PL2W     13.24 dB
PL3      13.24 dB
PL3W     11.48681641 W
PL4W     0.40383106 W
PL13W    0.40383106 W
SFO2     400.1316005 MHz

F2 - Processing parameters
SI       32768
SF       100.6127690 MHz
WDW      EM
SSB      0
LB       1.00 Hz
GB       0
PC       1.40
```

Fig. S19  $^{13}\text{C}$  NMR spectrum of **4** in  $d_6$ -DMSO.

Ki ran Kumar SDSA-120

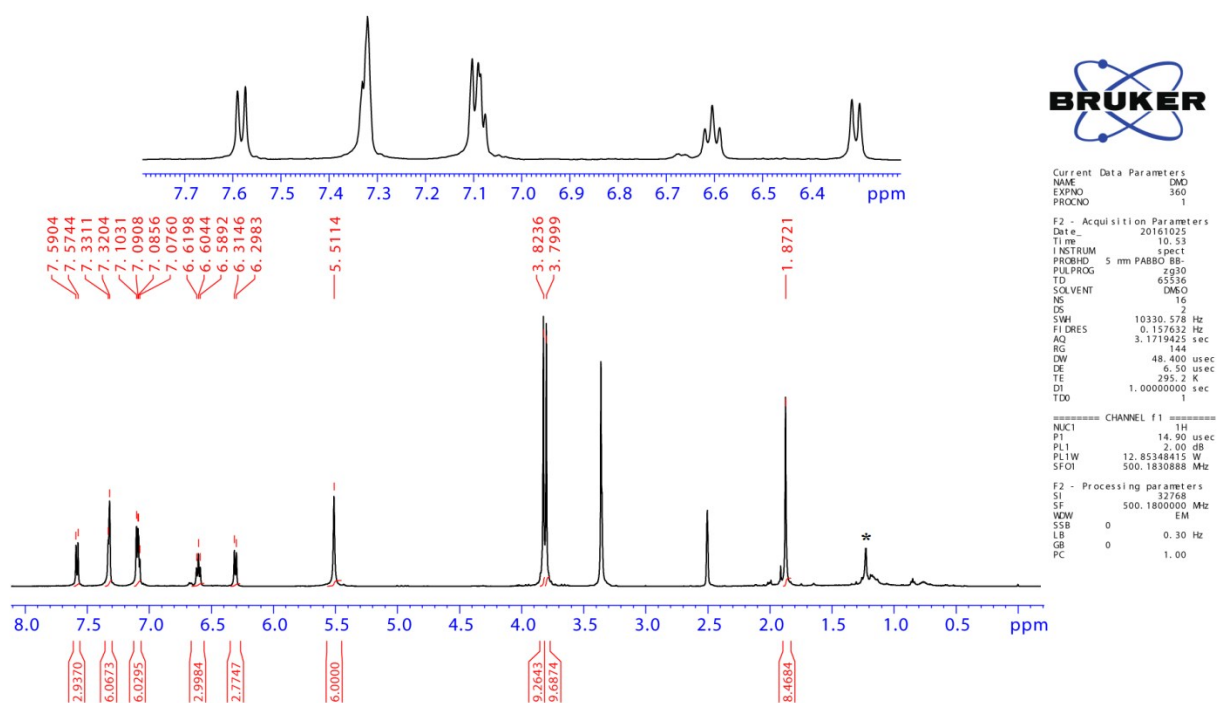

Fig. S20 <sup>1</sup>H NMR spectrum of **5** in *d*<sub>6</sub>-DMSO (\* = residual solvent peak).

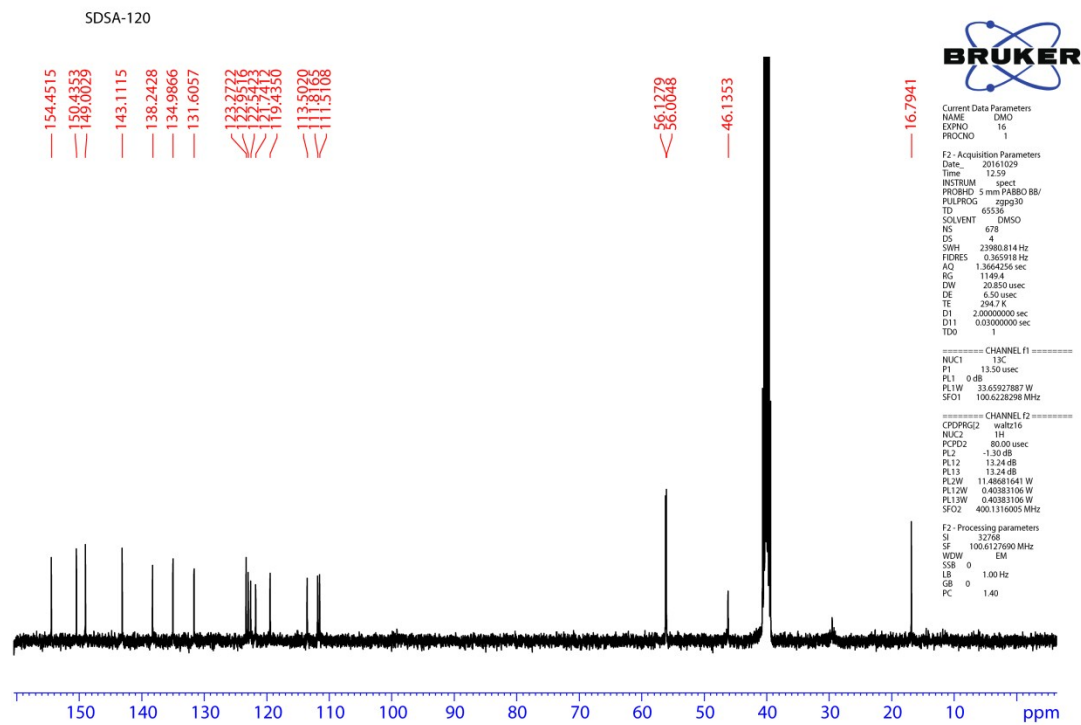

Fig. S21  $^{13}\text{C}$  NMR spectrum of **5** in  $d_6$ -DMSO.

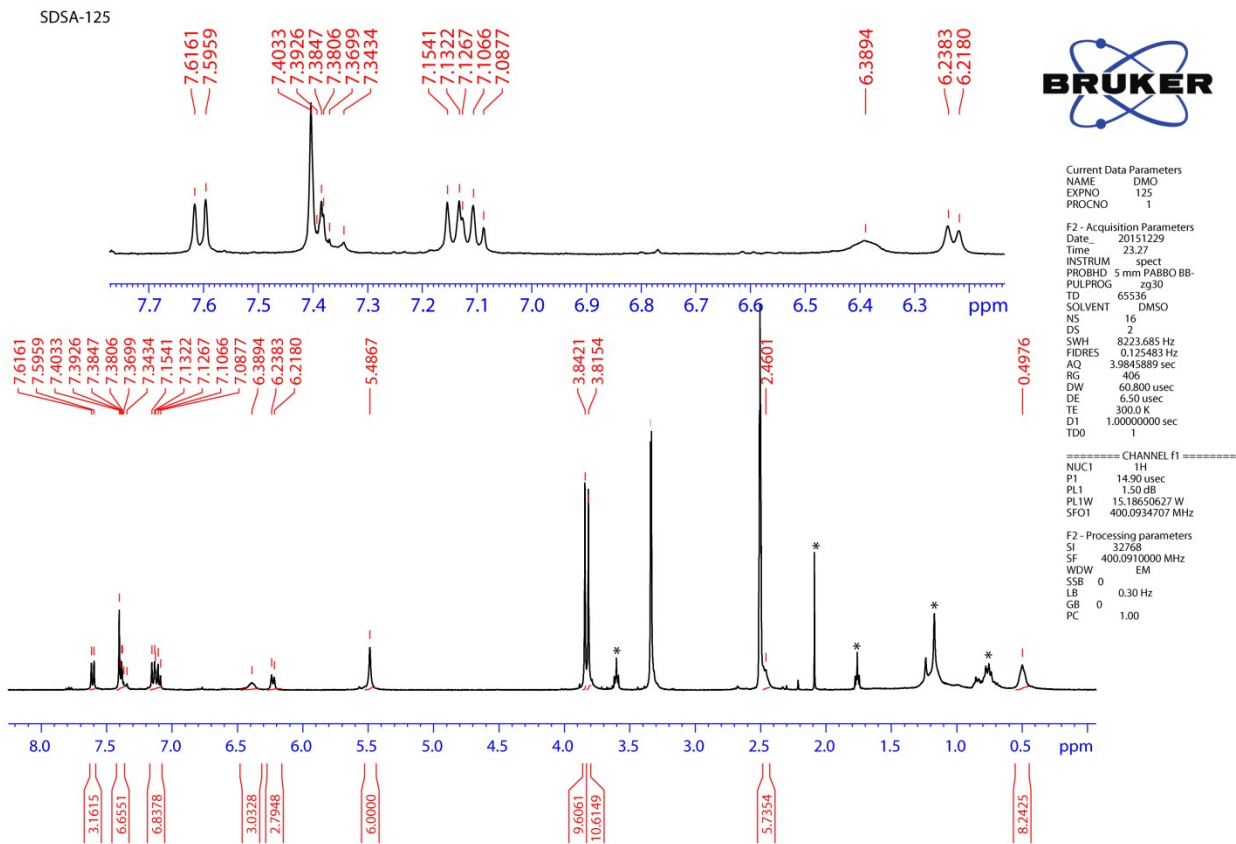

Fig. S22  $^1\text{H}$  NMR spectrum of **6** in  $d_6$ -DMSO (\* = residual solvent peaks).

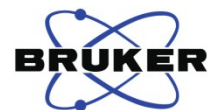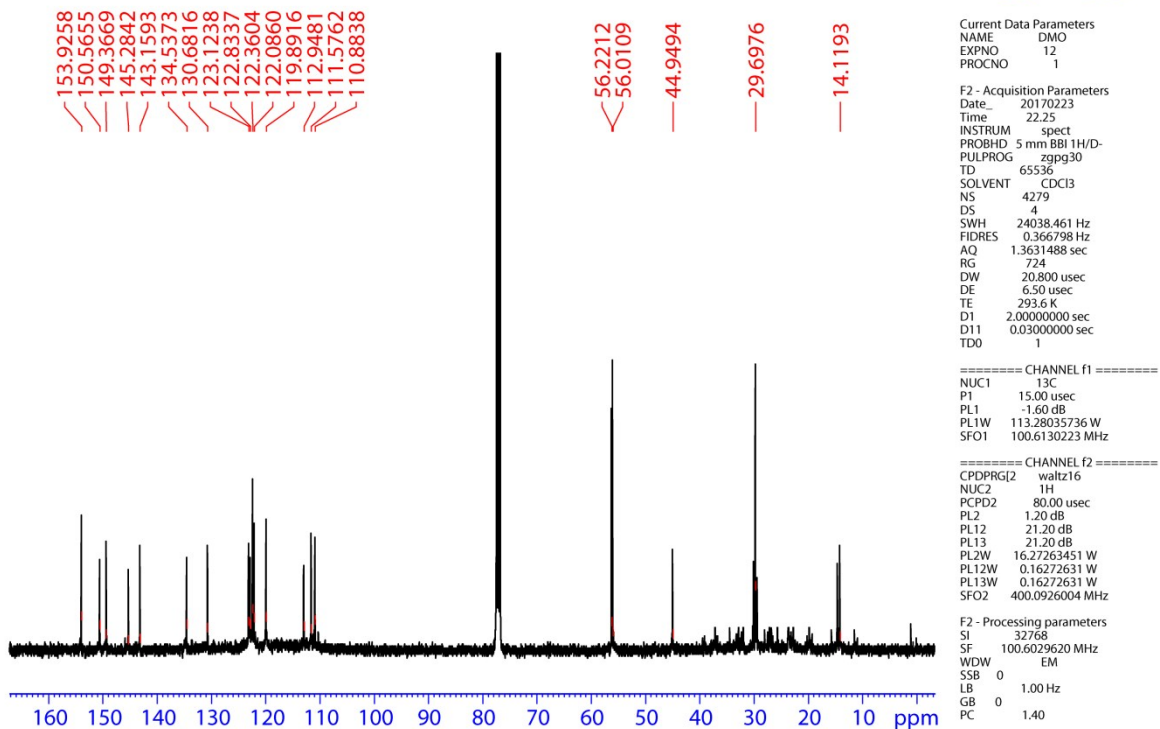

. S23  $^{13}\text{C}$  NMR spectrum of **6** in  $\text{CDCl}_3$ .

Fig

Kiran Kumar SDS2-110

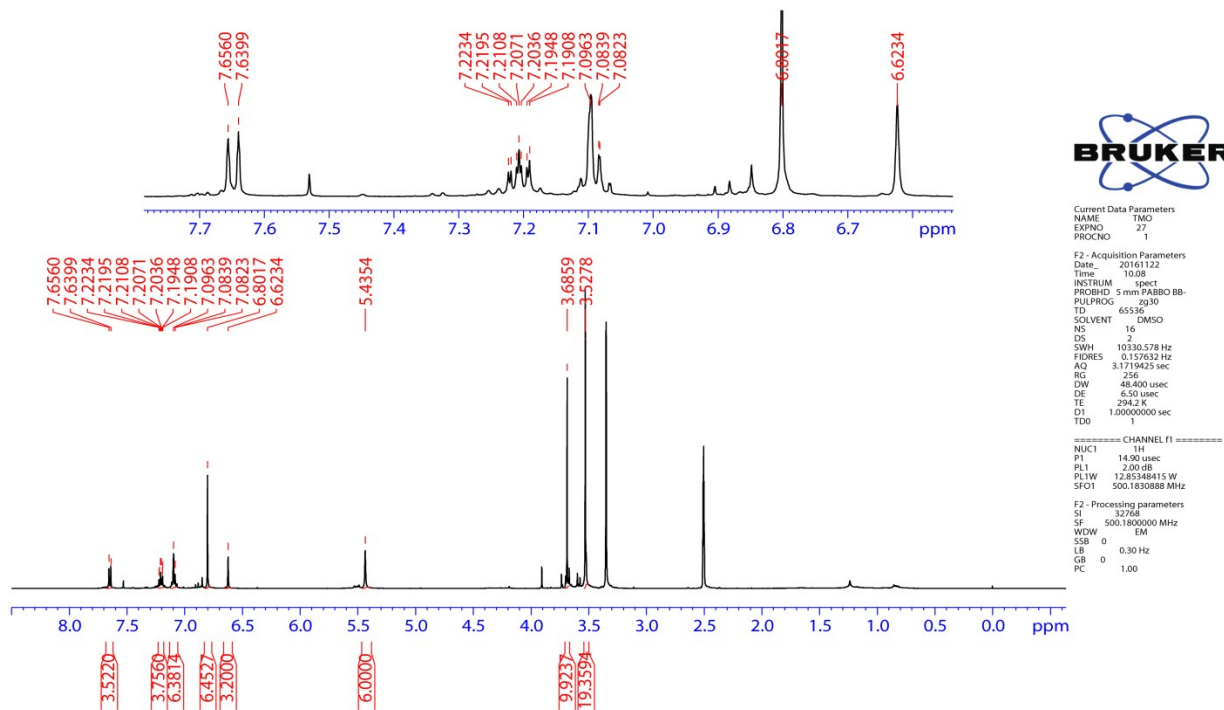

Fig. S24  $^1\text{H}$  NMR spectrum of **7** in  $d_6$ -DMSO.

Ch Kiran Kumar SD52-110

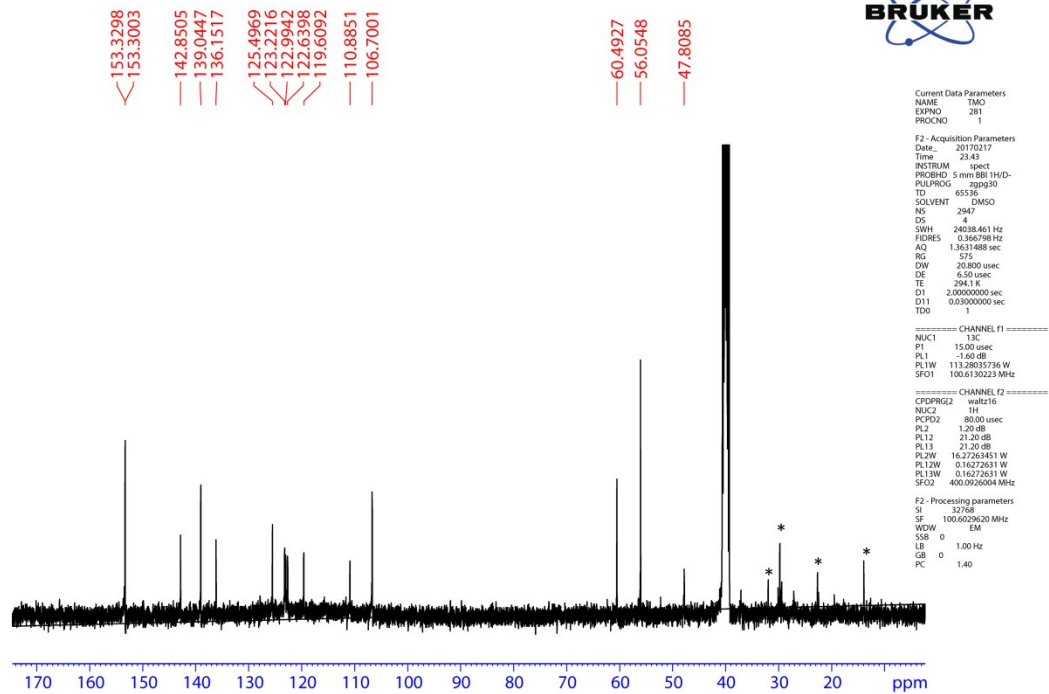

Fig. S25  $^{13}\text{C}$  NMR spectrum of **7** in  $d_6$ -DMSO (\* = residual solvent peaks).

Kiran Kumar SDS2-108

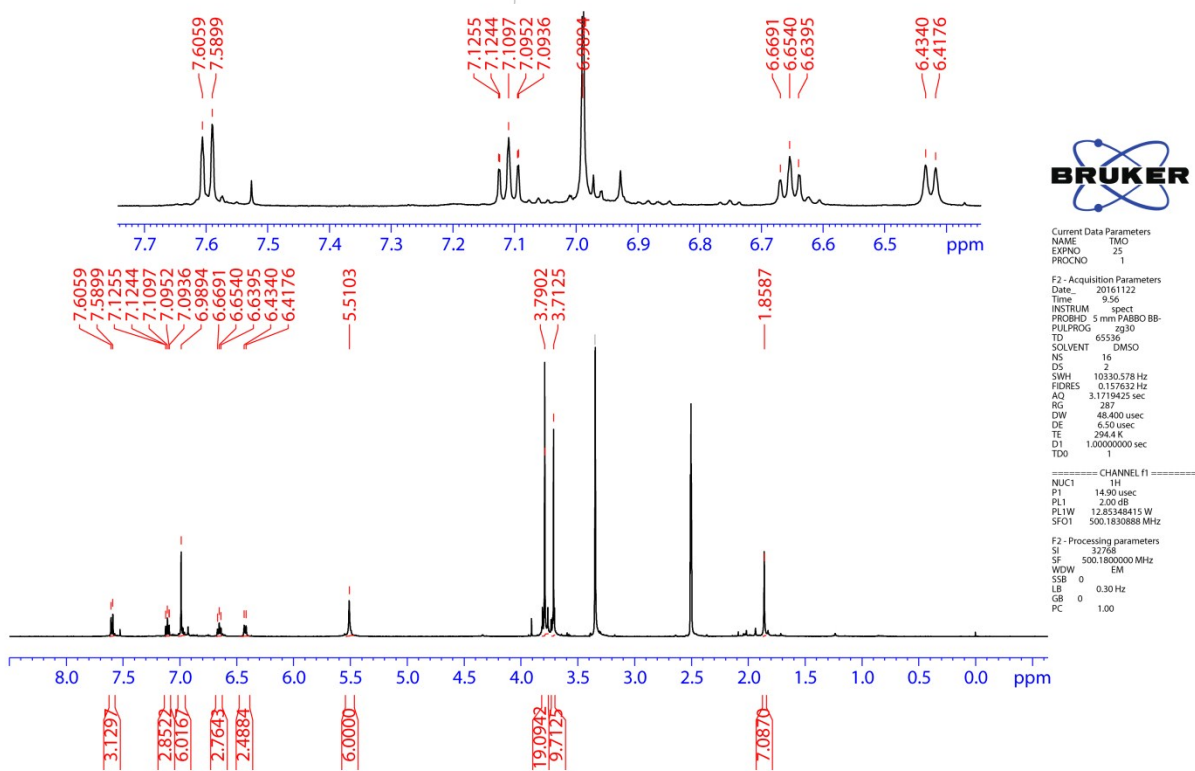

Fig. S26 <sup>1</sup>H NMR spectrum of 8 in d<sub>6</sub>-DMSO.



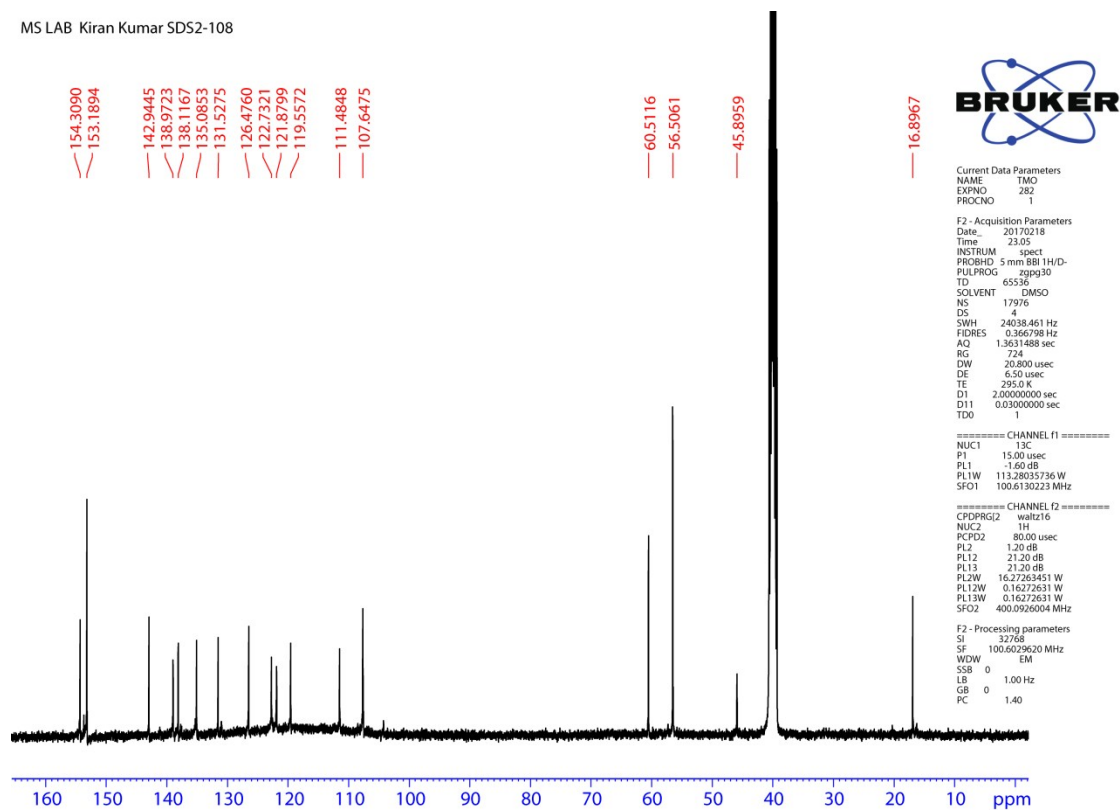

Fig. S27 <sup>13</sup>C NMR spectrum of **8** in *d*<sub>6</sub>-DMSO.

Kiran Kumar SDS2-130

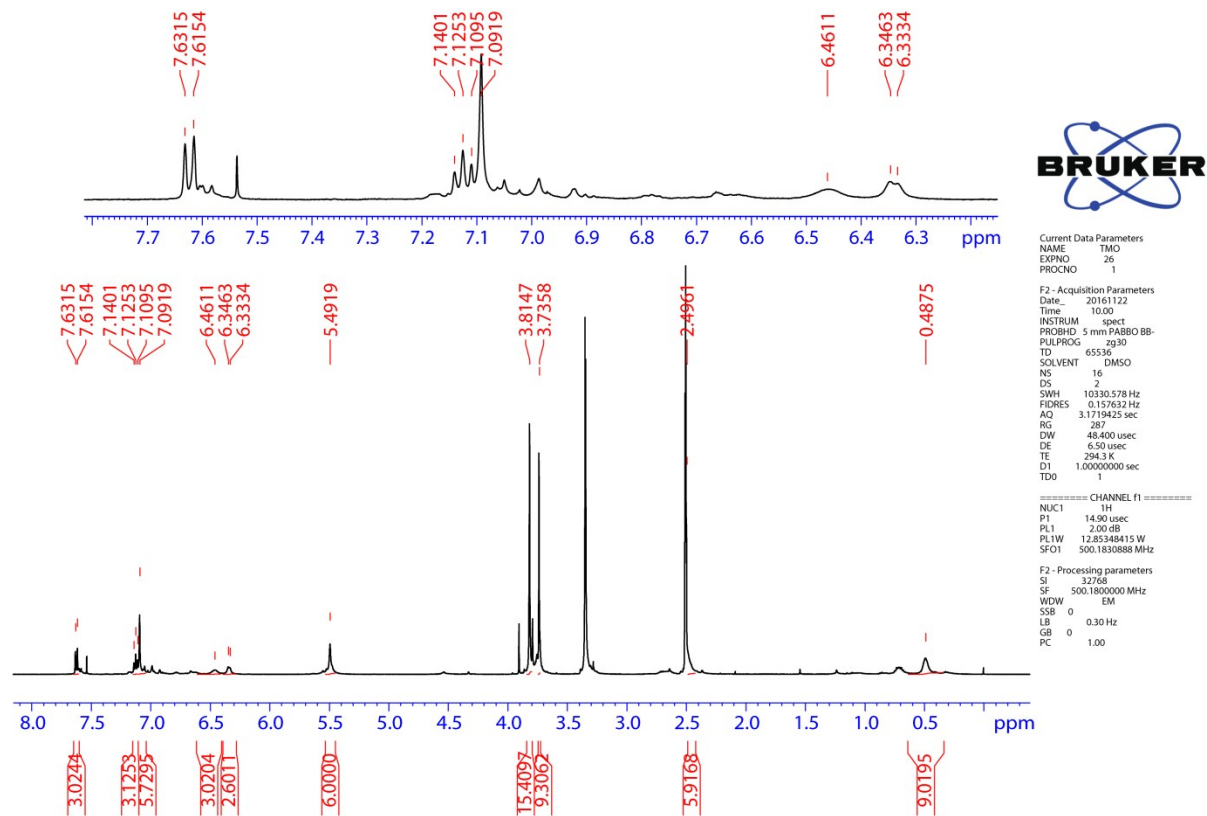

Fig. S28 <sup>1</sup>H NMR spectrum of 9 in *d*<sub>6</sub>-DMSO.

Ch.Kiran Kumar SDS2-130

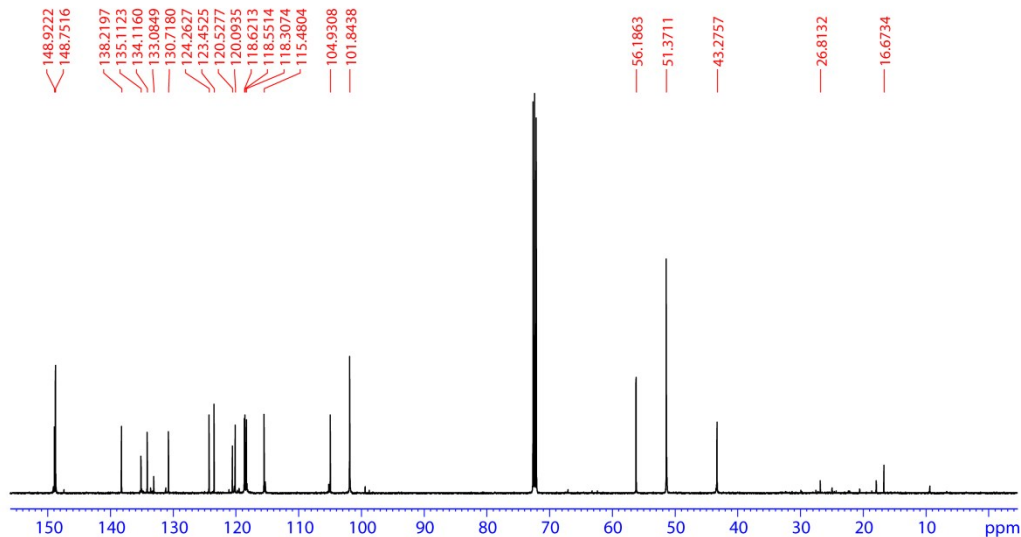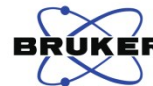

```
Current Data Parameters
NAME      TMO
EXPNO    70
PROCNO   1

F2 - Acquisition Parameters
Date_    20170220
Time     14.21
INSTRUM spect
PROBHD   5 mm PABBO BB-
PULPROG zgpg30
TD       65536
SOLVENT  DMSO
NS       3502
DS       4
SWH      29761.994 Hz
FIDRES   0.454131 Hz
AQ       1.1010048 sec
RG       2050
DW       16.800 usec
DE       6.50 usec
TE       271.9 K
D1       2.0000000 sec
D11      0.0300000 sec
TD0      1

===== CHANNEL f1 =====
NUC1     13C
P1       9.60 usec
PL1      0 dB
PL1W     76.36135101 W
SFO1     125.7629381 MHz

===== CHANNEL f2 =====
CPOPRG2  waltz16
NUC2     1H
PCPD2    80.00 usec
PL2      2.00 dB
PL12     16.50 dB
PL13     16.50 dB
PL2W     12.85348415 W
PL12W    0.45605880 W
PL13W    0.45605880 W
SFO2     500.1820007 MHz

F2 - Processing parameters
SI       32768
SF       125.7703610 MHz
WDW      EM
SSB      0
LB       1.00 Hz
GB       0
PC       1.40
```

F

ig. S29  $^{13}\text{C}$  NMR spectrum of **9** in  $\text{CDCl}_3$ .

## References

1. X. Han, H. Ma and Y. Wang, *Rus. J. Org. Chem.*, 2008, **44**, 863.
2. G. M. Sheldrick, *SHELXS-97, Program for Crystal Structure Solution*; University of Göttingen: Göttingen, Germany, 1997.
3. G. M. Sheldrick, *Acta Crystallogr., Sect. A: Found. Crystallogr.* 2008, **64**, 112; G. M. Sheldrick, *Acta Crystallogr., Sect. C: Struct. Chem.* 2015, **71**, 3.
4. T. Morimoto, H. Uno and H. Futura, *Angew. Chem. Int. Ed.*, 2007, **46**, 3672.
